1 **Broadly reactive human monoclonal antibodies targeting the pneumococcal histidine**  
2 **triad protein protect against fatal pneumococcal infection**

3

4 **Short title: PhtD human antibodies**

5

6 Jiachen Huang,<sup>1,2</sup> Aaron D. Gingerich,<sup>1</sup> Fredejah Royer,<sup>1</sup> Amy V. Paschall,<sup>3,4</sup> Alma Pena-  
7 Briseno,<sup>1</sup> Fikri Y. Avci,<sup>3,4</sup> Jarrod J. Mousa<sup>1,2,\*</sup>

8

9 <sup>1</sup>Center for Vaccines and Immunology, College of Veterinary Medicine, University of Georgia,  
10 Athens, GA, USA 30602

11

12 <sup>2</sup>Department of Infectious Diseases, College of Veterinary Medicine, University of Georgia,  
13 Athens, GA, USA 30602

14

15 <sup>3</sup>Department of Biochemistry and Molecular Biology, University of Georgia, Athens, GA 30602

16

17 <sup>4</sup>Center for Molecular Medicine, University of Georgia, Athens, GA 30602

18

19 \*corresponding author: [jarrod.mousa@uga.edu](mailto:jarrod.mousa@uga.edu)

20 **Abstract**

21 *Streptococcus pneumoniae* remains a leading cause of bacterial pneumonia despite the  
22 widespread use of vaccines. While vaccines are effective at reducing the incidence of most  
23 vaccine-included serotypes, a rise in infection due to non-vaccine serotypes, and moderate  
24 efficacy against some vaccine included serotypes have contributed to high disease incidence.  
25 Additionally, numerous isolates of *S. pneumoniae* are antibiotic or multi-drug resistant. Several  
26 conserved pneumococcal proteins prevalent in the majority of serotypes have been examined  
27 as vaccines in preclinical and clinical trials. An additional, yet unexplored tool for disease  
28 prevention and treatment is the use of human monoclonal antibodies (mAbs) targeting  
29 conserved pneumococcal proteins. Here, we isolate the first human mAbs (PhtD3, PhtD6,  
30 PhtD7, PhtD8, PspA16) against the pneumococcal histidine triad protein (PhtD), and the  
31 pneumococcal surface protein A (PspA), two conserved and protective antigens. mAbs to PhtD  
32 target diverse epitopes on PhtD, and mAb PspA16 targets the N-terminal segment of PspA. The  
33 PhtD-specific mAbs bind to multiple serotypes, while mAb PspA16 serotype breadth is limited.  
34 mAbs PhtD3 and PhtD8 prolong the survival of mice infected with pneumococcal serotype 3.  
35 Furthermore, mAb PhtD3 prolongs the survival of mice in intranasal and intravenous infection  
36 models with pneumococcal serotype 4, and in mice infected with pneumococcal serotype 3  
37 when administered 24 hours after pneumococcal infection. All PhtD and PspA mAbs  
38 demonstrate opsonophagocytic activity, suggesting a potential mechanism of protection. Our  
39 results provide new human mAbs for pneumococcal disease prevention and treatment, and  
40 identify epitopes on PhtD and PspA recognized by human B cells.

## 41 Introduction

42 *Streptococcus pneumoniae* remains a leading cause of infectious morbidity and mortality  
43 despite the widespread use of two vaccines for disease prevention (1). The World Health  
44 Organization estimates over 1 million deaths occur worldwide each year due to pneumococcal  
45 infection (2). Similar to other respiratory pathogens, individuals below the age of 2 and above 65  
46 years of age are more susceptible to invasive pneumococcal disease (3). In addition, there is  
47 also an increased frequency and risk of severe infection in individuals with preexisting  
48 conditions, including those with diabetes, chronic obstructive pulmonary disease, cardiovascular  
49 diseases, and human immunodeficiency virus (4). Although vaccination is widespread in the  
50 developed world, pneumococcal infection is responsible for 30% of adult pneumonia and has a  
51 mortality rate of 11-40% (5). Furthermore, in regions of the world with high childhood mortality  
52 rates, pneumococcal pneumonia is the cause of death for 20-50% of children (6).

53 *S. pneumoniae* is a common resident of the upper respiratory tract (7), and  
54 pneumococcal carriage precedes active infection (8). In young children, carriage rates of *S.*  
55 *pneumoniae* can be as high as 40-60% (9). Colonization is typically asymptomatic, however, *S.*  
56 *pneumoniae* can rapidly disseminate, often following a primary infection such as influenza (10)  
57 or COVID-19 (11), to cause pneumonia and invasive disease. Repeated colonization with *S.*  
58 *pneumoniae* typically results in immunization, and several studies have determined that  
59 colonization induces serum antibody responses to the capsular polysaccharide (12), and both  
60 serum antibody (13–17) and cellular immune responses to protein antigens (18, 19). These  
61 antibody levels in serum increase during the first few years of life (16), but tend to decrease in  
62 the elderly (20), which may contribute to the higher risk of disease in children and the elderly.

63 The majority of *S. pneumoniae* isolates are encapsulated, and 100 capsular serotypes  
64 have been identified (21), which are based on differences in the chemical structures of the  
65 capsular polysaccharide in each serotype (22). Current vaccines are based on eliciting  
66 opsonophagocytic antibody responses to the capsular polysaccharide, and utilize either a 13-

67 valent diphtheria toxoid conjugate vaccine to elicit T-dependent, high-affinity, and class-  
68 switched antibody responses (PCV13), or a 23-valent capsular polysaccharide mixture  
69 (PPSV23) to elicit T-independent antibody responses, or as a booster to PCV13. Anti-glycan  
70 antibodies produced in response to the vaccine are serotype-specific due to the distinct  
71 chemical structures of the capsular polysaccharides (23). Although vaccines have been highly  
72 effective at reducing the incidence of pneumococcal disease, a rise in the incidence of non-  
73 vaccine serotypes has occurred, termed serotype replacement (24). In addition, the incidence of  
74 invasive disease due to serotypes 3 and 19A have persisted in some reports despite  
75 widespread vaccination (25). In terms of treatment, antibiotic resistance among non-vaccine  
76 serotypes has risen, and presents challenges in treating pneumococcal infection (26). Based on  
77 the limitations of current vaccines and treatments, additional options are currently being  
78 explored. For many years, such research has focused on developing vaccines that are broadly  
79 reactive, primarily based on the idea that conserved protein antigens present in the majority of  
80 pneumococcal serotypes would be effective at preventing disease independent of serotype (27).  
81 Multiple antigens have been tested in preclinical infection models, with several entering clinical  
82 trials, including the toxin pneumolysin, pneumococcal surface protein A (PspA), pneumococcal  
83 surface antigen A (PsaA), pneumococcal choline binding protein A (PcpA), PcsB, serine  
84 threonine kinase protein (StkP), and pneumococcal histidine triad protein (PhtD) (28).

85 PhtD is a member of a group of conserved surface proteins on *S. pneumoniae* that also  
86 includes PhtA, PhtB, and PhtC, all of which share histidine triad motifs (29). The proteins have  
87 high sequence homology to each other, and PhtB and PhtD share 87% sequence homology  
88 (30). PhtD is highly conserved, varying 91-98% among strains isolated from invasive disease  
89 cases in children (31). One study of 107 pneumococcal strains showed PhtD was expressed in  
90 100% of tested serotypes (30), while other studies have found PhtD is widely prevalent but is  
91 absent in a subset of isolated strains (32–34). The function of the Pht family of proteins has not  
92 been fully elucidated, although data has implicated the proteins in attachment of *S. pneumoniae*

93 to respiratory epithelial cells (35, 36). In addition, the first histidine triad motif of PhtD has been  
94 shown to be important for zinc acquisition and bacterial homeostasis (37). Although the full  
95 structure of PhtD has not been determined, a crystal structure of the third histidine triad motif  
96 bound to  $Zn^{2+}$ , and a solution NMR structure of the N-terminal fragment of PhtD has been  
97 determined (38, 39). All Pht proteins are immunogenic and induce protective humoral immunity,  
98 and vaccination with these proteins was shown to reduce colonization, sepsis, and pneumonia  
99 (29, 40, 41). PhtD has been shown to protect against systemic pneumococcal disease in a  
100 mouse model (29), and immunization of rhesus macaques with PhtD along with detoxified  
101 pneumolysin protected the animals against pneumococcal infection (42). Fragments of PhtD  
102 have also been assessed for protective efficacy, and somewhat conflicting reports have  
103 demonstrated that both the N and C terminus are immunogenic and protective (43, 44). PhtD  
104 was recently used as an antigen in a phase IIb clinical trial, demonstrating that PhtD remains an  
105 antigen of interest in pneumococcal vaccinology, although PhtD was administered along with  
106 PCV13, so a direct comparison of PhtD vs PCV13 was not accomplished (45). Mouse  
107 monoclonal antibodies to PhtD were shown to protect mice using a macrophage and  
108 complement dependent mechanism (46), and human polyclonal antibodies to PhtD were shown  
109 to reduce adherence of the pneumococcus to lung epithelial cells and reduce murine  
110 nasopharyngeal colonization (47). Human polyclonal antibodies generated in response to alum  
111 adjuvanted PhtD vaccination were also shown to protect mice from pneumococcal disease (48).

112 Another vaccine antigen, PspA, is an important virulence factor of *S. pneumoniae* and  
113 one of the most abundant surface proteins (49). As with PhtD, PspA is found in the majority of  
114 examined clinical isolates (33, 50). PspA mutant strains are cleared faster from the blood of  
115 mice compared to intact strains (51), and vaccination with PspA protects mice from  
116 pneumococcal infection (52–58). PspA is less conserved than PhtD, and is grouped into three  
117 families with >55% identity, and six clades with >75% identity (59). PspA has four distinct  
118 structural domains, including the alpha-helical region, the proline rich region, the choline binding

119 repeat domain, and the cytoplasmic tail, of which the proline rich region is highly conserved  
120 across clades, while the N-terminal alpha-helical region is more variable (60). PspA has been  
121 shown to inhibit complement deposition (61–63), and has shown specificity for binding of human  
122 lactoferrin, although the importance of this binding is unclear (64). An X-ray crystal structure of  
123 the lactoferrin binding domain of PspA in complex with the N-terminal region of human  
124 lactoferrin has been determined (65). Mouse mAbs to PspA have been shown to prolong  
125 survival of mice, and improve efficacy of antibiotic treatment (64). Additionally, antibodies  
126 isolated from humans following immunization with recombinant PspA are broadly cross-reactive  
127 and protect mice from pneumococcal infection with heterologous PspA (66, 67). A clinical trial of  
128 a recombinant attenuated salmonella typhi vaccine vector producing PspA has been completed  
129 (NCT01033409), and a protein-based Phase Ia clinical trial incorporating PspA is current  
130 underway (NCT04087460).

131         It is well-defined that antibodies can prevent pneumococcal infection based on the  
132 success of antibody-based pneumococcal vaccines. Since both PspA and PhtD are protective  
133 antigens, and elicit protective antibodies, it is reasonable to assume that human mAbs to these  
134 antigens would be protective. As these proteins are highly conserved across pneumococcal  
135 serotypes, mAbs to PhtD and PspA could prevent and possibly treat disease from a broad-  
136 spectrum of pneumococcal serotypes. Human mAbs are promising as therapeutics for bacterial  
137 pathogens, as bezlotoxumab was FDA approved for prevention of recurrent *Clostridium difficile*  
138 infection (68). However, there have been no human mAbs isolated to any pneumococcal protein  
139 antigens. Serum antibodies to PhtD and PspA are elicited in response to pneumococcal  
140 carriage (16, 69, 70), and in this study, we generated human monoclonal antibodies to PhtD and  
141 PspA from healthy human subjects. We determined the serotype breadth and epitope specificity  
142 of the mAbs, and demonstrated the protective efficacy of PhtD-specific human mAb in multiple  
143 mouse models of pneumococcal infection.

144



146 **Results**

147

148 Isolation of pneumococcal protein-specific human mAbs

149 To identify PhtD and PspA-specific human mAbs, we recombinantly expressed His-  
150 tagged PhtD and PspA from strain TCH8431 (serotype 19A) in *E. coli* (**Figure 1A**), and utilized  
151 these proteins to screen stimulated B cells from human donor peripheral blood mononuclear  
152 cells (PBMCs) as previously described (71). PBMCs from healthy human subjects were plated  
153 onto a feeder layer expressing human CD40L, human IL-21, and human BAFF for six days to  
154 stimulate B cell growth and antibody secretion. Cell supernatants from the stimulated B cells  
155 were screened against recombinant PhtD and PspA by enzyme-linked immunosorbent assay.  
156 Responses to the recombinant proteins were varied between subjects as shown in an example  
157 in **Figure 1B**. From five subject PBMCs, we fused several reactive wells for generation of  
158 human hybridomas and subsequent human mAb isolation. Four hybridomas lines, each from  
159 unique donors, were successfully generated and biologically cloned by single cell sorting for  
160 PhtD, and one mAb was generated for PspA from an independent subject. Each of the mAbs to  
161 PhtD had similar binding  $EC_{50}$  values determined by ELISA (**Figure 1C**), and mAbs to PhtD and  
162 PspA bound with high avidity with  $EC_{50}$  values ranging from 26-45 ng/mL (**Figure 1C, 1D**). To  
163 determine the V, D, and J genes utilized by each mAb, the hybridomas were sequenced by RT-  
164 PCR followed by TA cloning and the results are shown in **Table 1**, and the sequences are  
165 provided in supplemental material. mAbs PhtD3 and PhtD6 utilize kappa light chains, while  
166 mAbs PhtD7 and PhtD8 use lambda light chains. All mAbs were of the IgG<sub>1</sub> isotype based on  
167 isotyping data determined by ELISA. All mAbs utilize unique heavy chain and light chain V  
168 genes, with the exception of mAbs PhtD7 and PhtD8, as these share predicted V<sub>L</sub> and J<sub>L</sub> gene  
169 usage, although LCDR3 sequences share little sequence identity. mAbs PhtD7 and PhtD8  
170 share V<sub>H</sub> and J<sub>H</sub> gene usage, although vary in the use of the D<sub>H</sub> gene, which leads to stark  
171 differences in CDR3 lengths, with mAbs PhtD7 and PhtD8 having 20 amino acid and 8 amino



172 acid length HCDR3 lengths, respectively. mAb PspA16 shares V gene usage with mAbs PhtD7  
173 and PhtD8.

174

#### 175 Epitope mapping of the human mAbs

176 To identify the specific regions of PhtD targeted by the human mAbs, we generated  
177 truncated fragments of PhtD based on a secondary structure predictor. The fragments were  
178 fused to the maltose binding protein (MBP) to ensure solubility, and expressed in *E. coli* and  
179 purified using amylose resin. The majority of the fragments were >90% pure with the exception  
180 of free MBP protein for the MBP fusion proteins (**Figure 2A**). To identify the specific regions of  
181 PhtD targeted by the isolated mAbs, we measured ELISA binding of mAbs to fragments of  
182 PhtD. Since there are no previous mAbs that have been generated to these proteins with  
183 defined epitopes, the generated fragments provide rough estimates of mAb epitopes. Each of  
184 the four mAbs bind to a unique region on the PhtD protein (**Figure 2B**). mAbs PhtD3 and PhtD6  
185 bind the N-terminal portion of the protein, while mAb PhtD8 binds the C-terminal portion. mAb  
186 PhtD7 appears to target a unique conformational epitope that is dependent on amino acids 341-  
187 838, but this mAb does not bind 341-647 or 645-838 fragments. We next assessed the epitopes  
188 of the mAbs by competitive biolayer interferometry to compare the binding epitopes between  
189 mAbs. Anti penta-His biosensors were loaded with His-tagged PhtD protein, and mAbs were  
190 competed for binding sequentially (**Figure 2C,2D**). The mAbs bind distinct regions with limited  
191 competition similar to results from the fragment ELISA data. mAbs PhtD3 and PhtD6 show  
192 intermediate competition, and the epitopes for these mAbs also overlap in our fragment ELISA  
193 data. To map the binding region of mAb PspA16, we fragmented PspA into several truncations  
194 based on previously determined domains (**Figure 3A**) (60). mAb PspA16 had high avidity to  
195 recombinant PspA, and bound to the N-terminal fragment 1-247 based on positive binding to  
196 amino acid fragments 1-438 and 1-512 and negative binding to 247-512, 436-725, and 247-725  
197 fragments (**Figure 3B**).

198

199 Serotype breadth of the isolated PhtD-specific mAbs

200           Pneumococcal surface proteins PhtD and PspA are conserved across serotypes, and  
201 are widely prevalent in the majority of serotypes. As such, human mAbs to these antigens could  
202 have the potential to treat pneumococcal infection from multiple serotypes. In order to determine  
203 the serotype breadth of the isolated mAbs, we initially assessed mAb binding to two diverse  
204 pneumococcal serotypes, strain TCH8431 (serotype 19A), from which the genes for  
205 recombinant PhtD and PspA proteins were cloned and expressed, and the commonly used  
206 laboratory strain TIGR4 (serotype 4). PspA shares 88% amino acid sequence identity between  
207 TCH8431 and TIGR4, although significant variability is present in the N-terminal domain, with  
208 70% identity in amino acids 1-247. In contrast, PhtD shares 98% amino acid sequence identity  
209 between these two strains. We conducted western blots by probing bacterial lysates from  
210 TIGR4 and TCH8431 with mAbs PhtD3 and PspA16. mAb PspA16 only labels PspA protein  
211 from strain TCH8431 (**Figure 4A**), while mAb PhtD3 is able to label PhtD protein from both  
212 pneumococcal strains. However, as the bacterial lysis likely results in protein denaturation, it is  
213 possible the epitope for mAb PspA16 is altered during denaturation. We next determined if  
214 mAbs isolated against each of the recombinant proteins bind whole bacteria. We conducted  
215 ELISA assays by coating plates with fixed bacteria and measuring mAb binding by ELISA.  
216 mAbs PhtD3, PhtD6, PhtD7, and PhtD8 were broadly reactive across multiple unrelated  
217 pneumococcal serotypes, and mAbs PhtD3, PhtD6, and PhtD7 had higher avidity to fixed  
218 bacteria as compared to PhtD8 (**Figure 4B**). In contrast, PspA16 bound only to strain TCH8431,  
219 similar to results from the western blot experiments. Since PspA16 binds to the most variable  
220 region of PspA, the reduced binding to divergent serotypes was expected. In a third experiment,  
221 we assessed binding of the mAbs to a panel of pneumococcal serotypes by flow cytometry. As  
222 shown in **Figure 4C**, we utilized serum from a donor vaccinated 21 days previously with  
223 Prevnar-13 as a positive control. The PhtD mAbs bound to the majority of tested serotypes, with

224 mAbs PhtD3 and PhtD8 showing the broadest binding. In contrast, PspA16 bound only to  
225 TCH8431 and the serotype 3 strain WU2.

226

### 227 PhtD3 protects mice from fatal pneumococcal infection

228 As mAbs PhtD3 and PhtD8 exhibited the highest overall breadth in the serotype binding  
229 analysis by flow cytometry, these mAbs were further analyzed for protective efficacy in the  
230 mouse model. In addition, these mAbs were chosen in order to identify if the epitope specificity  
231 of mAbs to PhtD affect protective efficacy, as they target nonoverlapping epitopes. Mouse mAbs  
232 to PhtD (46) and polyclonal human antibodies from both healthy human subjects (47) and PhtD-  
233 vaccinated humans (48) have been shown to protect against colonization or disease in mouse  
234 models of pneumococcal infection. However, no human mAbs have been examined for  
235 protective efficacy. To determine if the PhtD-specific mAbs protect against infection, we  
236 examined the efficacy of mAbs PhtD3 and PhtD8 in a mouse model of pneumococcal  
237 pneumonia with a serotype 3 strain (WU2), as serotype 3 is a leading cause of invasive  
238 pneumococcal disease (72). Since the mAbs were isolated from human hybridomas, and thus  
239 have authentic human Fc regions, we isotype-switched the Fc region to the closest mouse  
240 homolog (human IgG<sub>1</sub> became mouse IgG<sub>2a</sub>). mAbs PhtD3 and PhtD8 chimeras with mouse  
241 IgG<sub>2a</sub> Fc regions (PhtD3-IgG<sub>2a</sub> and PhtD8-IgG<sub>2a</sub>) were recombinantly expressed in HEK293F  
242 cells for testing in the mouse model. As a control for the study, we purchased a mouse IgG<sub>2a</sub>  
243 isotype control antibody. We first examined the binding of the mAbs to ensure binding was still  
244 observed for the recombinant PhtD3-IgG<sub>2a</sub> and PhtD8-IgG<sub>2a</sub> mAbs, and that no binding was  
245 observed for the isotype control mAb. As expected, PhtD3-IgG<sub>2a</sub> and PhtD8-IgG<sub>2a</sub> had similar  
246 binding avidity to recombinant PhtD as hybridoma-derived PhtD, while the isotype control  
247 showed no binding (**Figure 5A**). We first tested the prophylactic efficacy of PhtD3-IgG<sub>2a</sub> and  
248 PhtD8-IgG<sub>2a</sub> in a pneumonia model with pneumococcal serotype 3. Both mAbs prolonged the  
249 survival of mice compared to the isotype control, although those mice treated with mAb PhtD3

250 demonstrated higher survival (80% versus 30%) (**Figure 5B, 5C**). As mAb PhtD3-IgG<sub>2a</sub>  
251 protected a larger percentage of mice, we chose this mAb for further analysis. mAb PhtD3-IgG<sub>2a</sub>  
252 was then tested for protective efficacy against pneumococcal serotype 4 (TIGR4) to identify if  
253 the broad binding correlates to broad protection. In experiments with TIGR4, we used only an  
254 isotype control mAb group since no significant difference was observed between the PBS and  
255 isotype control mAb groups in the serotype 3 experiments. For this serotype, we used CBA/N  
256 mice for the intranasal infection model as TIGR4 was not sufficiently lethal by intranasal  
257 infection in C57BL/6 mice. CBA/N mice have previously been shown to be susceptible to  
258 serotype 4 (73). PhtD3-IgG<sub>2a</sub> prolonged survival of mice, providing 93% protection compared to  
259 47% for the isotype control (**Figure 5C**). As we were not able to test PhtD3-IgG<sub>2a</sub> in an  
260 intranasal infection model with TIGR4 in C57BL/6 mice, we conducted an experiment in  
261 C57BL/6 mice in which mice were intravenously infected with TIGR4 to model septic  
262 pneumococcal infection. In this study, PhtD3-IgG<sub>2a</sub> prolonged survival of mice with 69% efficacy  
263 compared to 27% survival with the isotype control (**Figure 5D**). The most clinically relevant  
264 scenario for mAb treatment of pneumococcal infection would be administration after  
265 pneumococcal infection. To model such a scenario, we infected mice with pneumococcal  
266 serotype 3, and administered mAb PhtD3-IgG<sub>2a</sub> 24 hrs after infection. In this model, 65% of  
267 PhtD3-IgG<sub>2a</sub> treated mice survived the infection compared to 10% for the isotype control group  
268 (**Figure 5E**).

269

#### 270 PhtD-specific human mAbs have opsonophagocytic activity

271 The correlate of protection for current pneumococcal vaccines is based on the elicitation  
272 of anti-capsule antibodies that opsonize bacteria, leading to their phagocytosis by host immune  
273 cells and subsequent bacterial killing (74, 75). Mouse mAbs isolated by vaccination with PhtD  
274 were previously shown to induce bacterial opsonophagocytosis, which was dependent on  
275 complement and macrophages (46). To determine a potential mechanism of protection by

276 PhtD3, and additional PhtD mAbs, we utilized established opsonophagocytosis killing assays  
277 (OPKAs) using the HL-60 cell line. We tested the mAbs against serotypes 4 (strain TIGR4), 3  
278 (strain WU2), and serotype 19A (strain TCH8431), from which our PhtD and PspA constructs  
279 were cloned. These mAbs were also compared to purified IgG obtained from a human subject  
280 previously vaccinated with Prevnar-13 21 days before blood collection, as the OPKA assay is  
281 the standard to measure vaccine uptake (76). All PhtD mAbs induced decreased colony forming  
282 units against all three serotypes compared to no antibody and an irrelevant mAb to human  
283 metapneumovirus (**Figure 6A**). PspA16 also decreased colony forming units against all three  
284 serotypes, although the efficacy against serotype 4 was lower as expected based on the  
285 serotype binding data. To confirm these findings, we adopted a flow-based assay previously  
286 shown to work for group B Streptococcus (77). HL-60 cells were incubated with opsonized  
287 bacteria that were labeled with pHRodo, which leads to fluorescent HL-60 cells upon  
288 phagocytosis of labeled bacteria. Similar to our results from the OPKA assay, all PhtD mAbs  
289 induced an increase in pHRodo+ HL-60 cells compared to no antibody and isotype control  
290 antibody analyses (**Figure 6B**). Purified IgG from an unvaccinated donor showed the highest  
291 number of pHRodo+ cells, as human IgG contains antibodies to multiple pneumococcal surface  
292 proteins. Interestingly, PspA16 also induced increased uptake to all three serotypes in this  
293 assay, although the highest activity was observed for serotype 19A, the serotype from which we  
294 cloned our PspA gene.

295

296

## 297 Discussion

298 In this study, we have isolated and determined the binding affinity, epitope specificity,  
299 serotype breadth, and protective properties of the first human mAbs to any pneumococcal  
300 surface protein. Both PhtD and PspA have been examined in depth as vaccine candidates for  
301 prevention of pneumococcal infection, although the current outlook for progress of these  
302 antigens in the era of conjugate vaccines remains uncertain. However, human mAbs to these  
303 conserved antigens offer the ability for pan-serotype recognition and potentially disease  
304 prevention and treatment. In contrast, human mAbs isolated following vaccination with  
305 pneumococcal polysaccharide vaccines are highly serotype specific (23), and would offer limited  
306 use in the clinic due to their highly specific serotype specificity.

307 Based on the B cell stimulation and screening results, it is clear that healthy individuals  
308 have circulating B cells specific to pneumococcal antigens PhtD and PspA. One drawback of  
309 our study is the lack of knowledge on the infection history of the human subjects used in the  
310 study. It has been previously shown that colonization by *S. pneumoniae* results in immunization,  
311 and it is unknown whether all of these donors were previously infected with *S. pneumoniae*.  
312 Therefore, the mAbs isolated here are likely the result of pneumococcal colonization, which  
313 resulted in class switched B cells with 85-94% somatic mutation, which is similar to previous  
314 work in our lab studying healthy individuals who were presumed to be previously infected with  
315 human metapneumovirus (71, 78). Each of the PhtD-specific mAbs was isolated from unique  
316 human subjects, and mAbs PhtD3, PhtD6, and PhtD7/8 utilized different heavy and light chain V  
317 genes. Interestingly, mAbs PhtD7 and PhtD8 utilize the same V gene in both heavy and light  
318 chain, yet differ in the predicted heavy chain J gene, which leads to highly different CDR3  
319 lengths. Although these two mAbs share common heavy and light chain V genes, the epitopes  
320 for these mAbs do not compete and have only partial overlap based on the binding experiments  
321 with truncated protein fragments. It is a striking observation that the N-terminal specificity of  
322 mAbs PhtD3 and PhtD6 correlates with higher binding to whole cell bacteria compared to

323 PhtD8, as the N-terminal region of the protein is predicted to be attached to the bacterial  
324 surface, leaving the C-terminal half more surface exposed (35). Further mapping experiments  
325 through X-ray crystallographic analysis will help clarify this observation. Previous work has  
326 identified specific linear peptide epitopes that are immunodominant in pediatric patients with  
327 invasive pneumococcal disease, and these included AA 88-107, AA 172-191, and AA 200-219  
328 (79). These peptides overlap with the epitopes for mAbs PhtD3 and PhtD6, although we have  
329 not yet determined if these mAbs bind these peptide epitopes. Overall, these data suggest the  
330 human antibody response to PhtD targets multiple epitopes. For PspA16, the mAb targets the  
331 N-terminal region of PspA, which has a high number of negatively charged residues, and has  
332 been shown to be protective in several studies (80). Mouse mAbs isolated against PspA were  
333 determined to target the N-terminal fragment as well, suggesting this domain is immunogenic in  
334 both mice and humans (80, 81). Although mAb PspA16 has limited serotype breadth, it is  
335 unclear if other human mAbs to PspA, even those targeting the N-terminal fragment, will be  
336 more broadly reactive. It is well established that the N-terminal region of PspA is more variable  
337 compared to the proline-rich region, and further studies will determine whether other PspA  
338 mAbs are more broadly-reactive than PspA16, as mAb PspA16 binds outside the highly  
339 conserved proline-rich region (82). Limitations of this current study include the limited number of  
340 mAb isolated for PhtD and PspA. Further isolation of mAbs will identify if the epitopes and gene  
341 usage of the mAbs described here are common in multiple donors.

342         Anti-pneumococcal mAbs have potential for use in the clinic, as current vaccines cover  
343 only a subset of current serotypes (although the most prevalent in invasive disease), and a rise  
344 in non-vaccine serotypes has occurred following vaccine introduction (24, 83). The prophylactic  
345 efficacy of mAbs PhtD3 and PhtD8 were demonstrated against pneumococcal serotype 3, a  
346 leading cause of invasive pneumococcal disease (24). We have also assessed the prophylactic  
347 efficacy of mAb PhtD3 against serotype 4 in both intranasal and intravenous infection studies, to  
348 model pneumococcal pneumonia and sepsis. Furthermore, we have demonstrated the mAb

349 PhtD3 prolongs survival of mice treated with the mAb 24 hrs after infection with pneumococcal  
350 serotype 3. As mAbs PhtD3 and PhtD8 target unique epitopes on the N-terminal and C-terminal  
351 region of PhtD, respectively, the higher survival of mAb PhtD3-treated mice suggests a potential  
352 role of epitope specificity in protective efficacy, although other factors such as functional activity,  
353 decreased binding to serotype 3 bacteria in the ELISA and flow binding assays compared to  
354 mAb PhtD3, CDR length and percent somatic hypermutation, and corresponding binding modes  
355 may be important for the observed differences. Further studies will need to be completed to  
356 determine the efficacy of other PhtD mAbs, to examine whether the specific epitope on PhtD  
357 indeed influences the protective efficacy of these mAbs, and to determine whether the mAbs  
358 protect against infection with additional serotypes. In addition, the delivery timing of the mAbs  
359 for optimal protection, the potential use of mAbs in combinations for improved protective  
360 efficacy, and the use of mAbs in concert with antibiotic treatment will need to be examined.  
361 Furthermore, as secondary pneumococcal infection is prominent following influenza (10) and  
362 SARS-CoV-2 infection (11), another potentially useful scenario for use of anti-pneumococcal  
363 mAbs would be administration following primary viral infection, to prevent secondary  
364 pneumococcal infection. Further studies will need to be completed to determine if mAb PhtD3 or  
365 other mAbs will protect against secondary infection.

366 A potential mechanism of protection for mAbs PhtD3 and PhtD8, and the functional  
367 activity of the other PhtD- and PspA-specific mAbs were assessed in opsonophagocytic assays.  
368 While showing activity in these *in vitro* assays, the mechanism of protection *in vivo* was not  
369 determined and will need to be further explored. mAbs to the pneumococcal capsular  
370 polysaccharide have been shown to be protective through multiple mechanisms, with even non-  
371 opsonic mAbs demonstrating protective efficacy and the ability to reduce pneumococcal  
372 colonization (84, 85). PhtD has been shown to be important for pneumococcal adherence (36,  
373 86), and mAbs to PhtD have also been shown to limit adherence of bacteria (47). Therefore,



374 additional protective mechanisms for anti-PhtD mAbs exist and may work in concert with  
375 opsonophagocytosis.

376 Overall, our study furthers the premise of using human mAbs to highly conserved  
377 surface antigens for prevention and treatment of pneumococcal infection. In addition, the  
378 application of human mAbs for other bacterial infections, particularly those that have concerns  
379 of antibiotic resistance is an important path forward for the development of new therapies.  
380 Further defining the epitope specificity of protective human mAbs to conserved pneumococcal  
381 surface proteins would also facilitate the development of an epitope-based, and potentially  
382 multi-antigen and broadly protective pneumococcal vaccine.

383

384

## 385 **Material and methods**

386

### 387 Ethics statement

388 This study was approved by the University of Georgia Institutional Review Board as  
389 STUDY00005127 and STUDY00005368. Healthy human donors were recruited to the  
390 University of Georgia Clinical and Translational Research Unit and written informed consent  
391 was obtained. For the Pevnar-13 vaccinated human samples, healthy subjects were recruited  
392 for vaccination with Pevnar-13, and a single blood sample was collected 21-28 days following  
393 immunization. All animal studies performed were in accordance with protocols approved by the  
394 Institutional Animal Care and Use Committee of the University of Georgia.

395

### 396 Blood draws and isolation of PBMCs

397 After obtaining informed consent, 90 mL of blood was drawn by venipuncture into 9 heparin-  
398 coated tubes, and 10 mL of blood was collected into a serum separator tube. Peripheral blood  
399 mononuclear cells (PBMCs) were isolated from human donor blood samples using Ficoll-  
400 Histopaque density gradient centrifugation, and PBMCs were frozen in the liquid nitrogen vapor  
401 phase until further use.

402

### 403 Pneumococcal protein cloning and expression

404 PspA and PhtD full-length proteins and fragments were cloned from the genome of *S.*  
405 *pneumoniae* strain TCH8431 (serotype 19A) with primers listed in **Table 2** below. The full-length  
406 PspA and PhtD were ligated into the pET28a vector while the fragments were ligated into the  
407 pMAL-c5x vector. The sequences of all constructed plasmids were confirmed by sequencing,  
408 and then transformed into *E. coli* BL21(DE3) for protein expression. Single colonies of  
409 transformed *E. coli* were picked and cultured in 5 mL of LB medium supplemented with  
410 antibiotic (50 µg/ml kanamycin for pET28a, 100 µg/ml ampicillin for pMAL-c5x) overnight in a

411 shaking incubator at 37 °C. The overnight culture was then expanded at a 1:100 ratio in 2x YT  
 412 medium with antibiotic and cultured at 37 °C. After the OD<sub>600</sub> reached 0.5 to 0.7, the culture was  
 413 induced with 50 μM isopropyl-D-thiogalactopyranoside for 12-16 hrs at room temperature.  
 414 Bacteria pellets collected by centrifugation at 6,000 x g for 10 min, and frozen at -80 °C. Thawed  
 415 *E. coli* pellets were resuspended in 10 mL of buffer containing 20 mM Tris pH 7.5 and 500 mM  
 416 NaCl, and then lysed by sonication. Cell lysates were centrifuged at 12,000 x g for 30 min and  
 417 the supernatant was subsequently used for protein purification through a HisTrap column (His-  
 418 tagged full-length proteins, GE Healthcare) or Amylose resin (MBP-tagged fragments, New  
 419 England Biolabs) following the manufacturer's protocols.

420

| <b>Table 2. Summary of primers used for cloning of PspA and PhtD genes.</b> |                                                                   |
|-----------------------------------------------------------------------------|-------------------------------------------------------------------|
| <b>Primer</b>                                                               | <b>Sequences (5' → 3')</b>                                        |
| PspA1-F                                                                     | CGCCATATGatggctaataagaaaaaatgattt                                 |
| PspA247-F                                                                   | CGCCATATGgagctaaacgctaaaca                                        |
| PspA436-F                                                                   | CGCCATATGgatgaagaagaaactccagcg                                    |
| PspA438-R                                                                   | TAGCGGCCGTTAATGGTGATGGTGATGGTGttctcatctccatcagggc                 |
| PspA512-R                                                                   | TAGCGGCCGTTAATGGTGATGGTGATGGTGtttgagtgctggttttc                   |
| PspA725-R                                                                   | TAGCGGCCGTTAATGGTGATGGTGATGGTgaaccattcaccattggcat                 |
| PhtD1-F                                                                     | CATGCCATGGCCatgaaaatcaataaaaaatctagcagg                           |
| PhtD168-F                                                                   | CATGCCATGGCCgcagataatgctgtgctg                                    |
| PhtD341-F                                                                   | CATGCCATGGCCtatcgttcaaaccattgggt                                  |
| PhtD645-F                                                                   | CATGCCATGGCCgaccattaccataacatcaaattg                              |
| PhtD170-R                                                                   | CCC <b>AAGCTTT</b> AATGGTGATGGTGATGGTGattatctgctcttgagttatgattatg |
| PhtD343-R                                                                   | CCC <b>AAGCTTT</b> AATGGTGATGGTGATGGTGtgaacgataacgaaggggaat       |
| PhtD647-R                                                                   | CCC <b>AAGCTTT</b> AATGGTGATGGTGATGGTGgtaatggcataatgaggtatgatta   |
|                                                                             | aa                                                                |

|                                                                 |                                                           |
|-----------------------------------------------------------------|-----------------------------------------------------------|
| PhtD838-R                                                       | <b>CCCAAGCTTTTAATGGTGATGGTGATGGT</b> Gctgtataggagccggttga |
| *Restriction enzyme sites are in bold, His-tags are underlined. |                                                           |

421

422 Enzyme-linked immunosorbent assay for binding to pneumococcal proteins

423 For recombinant protein capture ELISA assays, 384-well plates were treated with 20 µg/ml of  
424 antigen in PBS for 1 hr at 37 °C or overnight at 4 °C. Following this, plates were washed once  
425 with distilled water before blocking for 1 hr with 2% nonfat milk/2% goat serum in 0.05% PBS-T  
426 (blocking buffer). Plates were washed with water three times before applying serially diluted  
427 primary mAbs in PBS for 1 hr. Following this, plates were washed with water three times before  
428 applying 25 µL of secondary antibody (goat anti-human IgG Fc; Meridian Life Science) at a  
429 dilution of 1:4,000 in blocking solution. After incubation for 1 hr, the plates were washed five  
430 times with PBS-T, and 25 µL of a PNPP (p-nitrophenyl phosphate) solution (1 mg/ml PNPP in  
431 1 M Tris base) was added to each well. The plates were incubated at room temperature for  
432 1 hr before reading the optical density at 405 nm on a BioTek plate reader. Binding assay  
433 data were analyzed in GraphPad Prism using a nonlinear regression curve fit and the  
434 log(agonist)-versus-response function to calculate the binding EC<sub>50</sub> values.

435

436 Generation of pneumococcal-specific hybridomas

437 For hybridoma generation, 10 million peripheral blood mononuclear cells purified from the blood  
438 of human donors were mixed with 8 million previously frozen and gamma irradiated NIH 3T3  
439 cells modified to express human CD40L, human interleukin-21 (IL-21), and human BAFF(71) in  
440 80 mL StemCell medium A (StemCell Technologies) containing 6.3 µg/mL of CpG  
441 (phosphorothioate-modified oligodeoxynucleotide ZOEZOEZZZZZOEZOEZZZZT, Invitrogen)  
442 and 1 µg/mL of cyclosporine A (Millipore-Sigma). The mixture of cells was plated in four 96-well  
443 plates at 200 µl per well in StemCell medium A. After 6 days, culture supernatants were  
444 screened by ELISA for binding to recombinant pneumococcal protein, and cells from positive

445 wells were electrofused to generate hybridomas and biologically cloned as previously described  
446 (71).

447

#### 448 Human mAb expression and purification

449 For hybridoma-derived mAbs, hybridoma cell lines were expanded in StemCell medium A until  
450 80% confluent in 75-cm<sup>2</sup> flasks. Cells from one 75-cm<sup>2</sup> cell culture flask were collected with a  
451 cell scraper and expanded to 225-cm<sup>2</sup> cell culture flasks in serum-free medium (Hybridoma-  
452 SFM; Thermo Fisher Scientific). Recombinant cultures from transfection were stopped after 5 to  
453 7 days, and hybridoma cultures were stopped after 30 days. For recombinant PhtD3-IgG<sub>2a</sub>,  
454 plasmids encoding cDNAs for the heavy and light chain sequences of PhtD3-IgG<sub>2a</sub> were  
455 synthesized (GenScript), and cloned into pCDNA3.1+. mAbs were obtained by transfection of  
456 plasmids into Expi293F cells by transfection. For each milliliter of transfection, 1 µg of plasmid  
457 DNA was mixed with 4 µg of 25,000-molecular-weight polyethylenimine (PEI; PolySciences Inc.)  
458 in 66.67 µL Opti-MEM cell culture medium (Gibco). After 30 min, the DNA-PEI mixture was  
459 added to the Expi293F cells, and cells were cultured for 5-6 days for protein expression. Culture  
460 supernatants from both approaches were filtered using 0.45 µm filters to remove cell debris.  
461 mAbs were purified directly from culture supernatants using HiTrap protein G columns (GE  
462 Healthcare Life Sciences) according to the manufacturer's protocol.

463

#### 464 Isotype determination for human mAbs

465 For determination of mAb isotypes, 96-well Immulon 4HBX plates (Thermo Fisher Scientific)  
466 were coated with 2 µg/mL of each mAb in PBS (duplicate wells for each sample). The plates  
467 were incubated at 4 °C overnight and then washed once with water. Plates were blocked with  
468 blocking buffer and then incubated for 1 hr at room temperature. After incubation, the plates  
469 were washed three times with water. Isotype-specific antibodies obtained from Southern Biotech  
470 (goat anti-human kappa-alkaline phosphatase [AP] [catalog number 100244-340], goat anti-

471 human lambda-AP [catalog number 100244-376], mouse anti-human IgG1 [Fc]-AP [catalog  
472 number 100245714], mouse anti-human IgG2 [Fc]-AP [catalog number 100245-734], mouse  
473 anti-human IgG3 [hinge]-AP [catalog number 100245-824], and mouse anti-human IgG4 [Fc]-  
474 AP [catalog number 100245-812]) were diluted 1:1,000 in blocking buffer, and 50 µl of each  
475 solution was added to the respective wells. Plates were incubated for 1 h at room temperature  
476 and then washed five times with PBS-T. The PNPP substrate was prepared at 1 mg/mL in  
477 substrate buffer (1 M Tris base, 0.5 mM MgCl<sub>2</sub>, pH 9.8), and 100 µl of this solution was added to  
478 each well. Plates were incubated for 1 hr at room temperature and read at 405 nm on a BioTek  
479 plate reader.

480

#### 481 RT-PCR for hybridoma mAb variable gamma chain and variable light chain.

482 RNA was isolated from expanded hybridoma cells using the ENZA total RNA kit (Omega  
483 BioTek) according to the manufacturer's protocol. cDNA was obtained using the Superscript IV  
484 Reverse Transcriptase kit. Following this, PCR was conducted in two steps using established  
485 primers for the heavy chain, and kappa and lambda light chains (87). Samples were analyzed  
486 by agarose gel electrophoresis and purified PCR products (ENZA cycle pure kit; Omega Bio-  
487 Tek) were cloned into the pCR2.1 vector using the Original TA cloning kit (Thermo Fisher  
488 Scientific) according to the manufacturer's protocol. Plasmids were purified from positive DH5α  
489 colonies with ENZA plasmid DNA mini kit (Omega Bio-Tek) and submitted to Genewiz for  
490 sequencing. Sequences were analyzed using IMG/IT/V-Quest (88).

491

#### 492 Experimental setup for biolayer interferometry

493 For all biosensors, an initial baseline in running buffer (PBS, 0.5% bovine serum albumin [BSA],  
494 0.05% Tween 20, 0.04% thimerosal) was obtained. For epitope mapping, 100 µg/mL of His-  
495 tagged PhtD protein was immobilized on anti-penta-HIS biosensor tips (FortéBio) for 120 s. For  
496 binding competition, the baseline signal was measured again for 60 s before biosensor tips

497 were immersed into wells containing 100 µg/mL of primary antibody for 300 s. Following this,  
498 biosensors were immersed into wells containing 100 µg/mL of a second mAb for 300 s. Percent  
499 binding of the second mAb in the presence of the first mAb was determined by comparing the  
500 maximal signal of the second mAb after the first mAb was added to the maximum signal of the  
501 second mAb alone. mAbs were considered noncompeting if maximum binding of the second  
502 mAb was ≥66% of its uncompleted binding. A level of between 33% and 66% of its uncompleted  
503 binding was considered intermediate competition, and ≤33% was considered competition.

504

#### 505 Bacterial strains and growth conditions

506 Pneumococcal strains were grown at 37 °C in 5% CO<sub>2</sub> in Todd-Hewitt broth (BD, Franklin Lakes  
507 NJ) supplemented with 0.5% yeast extract for 12 hrs. Ten percent glycerol was added to the  
508 media and 500 µL aliquots were made. Cultures were kept at -80 °C until used, cultures were  
509 washed twice with PBS before being used in experiments. Colonies were grown on BD  
510 Trypticase Soy Agar II with 5% Sheep Blood (BD, Franklin Lakes NJ). The numbers of CFUs  
511 per milliliter of these stocks were determined, after the aliquots had been frozen, by plating a  
512 single quick-thawed diluted aliquot on sheep's blood agar plates. The calculated number of  
513 CFUs was subsequently used to make dilutions for experiments from aliquots thawed at later  
514 times. In each experiment, the actual number of CFUs administered was determined by plating  
515 on blood agar at the time of the assay. Strains used in this study are listed in **Table 3**.

516

| <b>Pneumococcal Strain</b> | <b>Serotype</b> | <b>Source</b>                          |
|----------------------------|-----------------|----------------------------------------|
| SPEC 1                     | 1               | BEI NR-13388                           |
| STREP2                     | 2               | BEI NR-31700                           |
| WU2                        | 3               | Gift from Dr. Moon Nahm, University of |

|          |     |                                                                        |
|----------|-----|------------------------------------------------------------------------|
|          |     | Alabama Birmingham                                                     |
| TIGR4    | 4   | Gift from Dr. Larry McDaniel, University of Mississippi Medical Center |
| SPEC6C   | 6C  | BEI NR-20805                                                           |
| SPEC6D   | 6D  | BEI NR-20806                                                           |
| STREP8   | 8   | BEI NR-31701                                                           |
| SPEC9N   | 9N  | BEI NR-31702                                                           |
| OREP10A  | 10A | BEI NR-31703                                                           |
| TREP11A  | 11A | BEI NR-31705                                                           |
| TREP12F  | 12F | BEI NR-31704                                                           |
| TREP15B  | 15B | BEI NR-33666                                                           |
| OREP17F  | 17F | BEI NR-31706                                                           |
| TCH8431  | 19A | BEI HM-145                                                             |
| SPEC20B  | 20B | BEI NR-33664                                                           |
| TREP22F  | 22F | BEI NR-31707                                                           |
| STREP33F | 33F | BEI NR-33665                                                           |

517

518 Western blot

519 Pneumococcal strains were mixed with non-reducing loading buffer (Laemmli SDS sample  
520 buffer, non-reducing 6X) and loaded on a 4-12% Bis-Tris gel (Invitrogen). Samples were then  
521 transferred to PVDF membranes via iBlot system (Invitrogen) and then blocked with 5%  
522 blocking buffer (5% nonfat milk in PBS-T) for 1 hr at room temperature or at 4°C overnight. The  
523 membrane was washed three times in five-minute intervals on an orbital shaker with 0.05%  
524 PBS-T. Then, primary antibodies were added at dilutions of 1 µg/mL in PBS for one hour at  
525 room temperature. The membranes were then washed three time in five-minute intervals with



526 PBS-T on an orbital shaker, and soaked in the secondary antibody at a 1:8,000 dilution in  
527 blocking buffer for one hour. Next, the membranes were then washed five times in five-minute  
528 intervals on the orbital shaker with PBS-T, and substrate (Pierce ECL Western Blotting  
529 Substrate, Thermo Scientific) was added and an image was taken immediately with the  
530 ChemiDoc Imaging System (BioRad).

531

#### 532 Enzyme-linked immunosorbent assay of fixed pneumococcus.

533 384-well plates were treated with 15  $\mu$ L ( $\sim 10^7$  CFUs) of whole cell pneumococcus in PBS into  
534 each well. Cell density was checked by microscope to ensure a confluent layer of  
535 pneumococcus was coated. The bacteria were then fixed with 15  $\mu$ l of 4% paraformaldehyde  
536 into each well and placed onto a plate shaker for 10 mins to mix. The 384-well plates were  
537 incubated at 4 °C for 24-48 hours to allow the bacteria to fix to the bottom of the plates.  
538 Following this, the plates were washed once with 75  $\mu$ l of PBS-T into each well. The plates were  
539 then blocked with 2% blocking buffer for 1 hr at room temperature then washed three times with  
540 PBS-T. Next, 25  $\mu$ l of serially diluted primary antibodies were applied to the wells for 1 hr at  
541 room temperature, then plates were washed with PBS-T three times. Following this, 25  $\mu$ l of  
542 secondary antibody (goat anti-human IgG Fc; Meridian Life Science) at a 1:4,000 dilution in  
543 blocking buffer was applied to each well for 1 hr at room temperature. After the plates were  
544 washed with PBS-T five times, 25  $\mu$ l of PNPP (p-nitrophenyl phosphate) solution (1 mg/ml  
545 PNPP in 1 M Tris bases) was added to each well for 1 hr at room temperature. After 1 hr the  
546 optical density was read at 405 nm on a BioTek plate reader. Binding assay data were analyzed  
547 in GraphPad Prism.

548

#### 549 Binding of antibodies to bacteria by flow cytometry

550 The ability of mAbs to bind antigen exposed on the surface of *S. pneumoniae* was  
551 determined by flow cytometry. Bacteria were stained with 10  $\mu$ M CFSE (Millipore Sigma) for

552 1 hr at 37 °C. Bacteria were then washed with Hank's Balanced Salt Solution (HBSS)  
553 containing 1% bovine serum albumin (BSA) to remove excess stain. Following this,  $1 \times 10^6$   
554 bacteria were incubated with 10 µg/ml of antibody for 30 min at 37 °C. Bacteria were then  
555 washed twice with HBSS+1% BSA. Antibody binding was detected using an APC Anti-  
556 Human IgG Fc (Biolegend) at a 1:100 dilution incubated for 1 hr with the bacteria. Cells  
557 were washed with HBSS+1% BSA and fixed in 2% paraformaldehyde (PFA) in PBS prior to  
558 analysis on a NovoCyte Quanteon Flow Cytometer.

559

#### 560 Determination of mAb efficacy

561 For intranasal challenge study with TIGR4, 5-7-week-old CBA/CaHN-Btkid/J (CBA/N) mice  
562 (The Jackson Laboratory, Bar Harbor, ME) were used. Mice were intraperitoneally inoculated  
563 with antibody treatments 2 hrs prior to pneumococcal infection. For infection, mice were  
564 anesthetized by inhalation of 5% isoflurane and intranasally challenged with 40 µL of PBS  
565 containing  $10^5$  colony-forming units (CFUs) of TIGR4. Mice were weighed and assessed daily,  
566 and were considered moribund when >20% of body weight was lost or they were nonresponsive  
567 to manual stimulation or exhibited respiratory distress. Mice were euthanized by CO<sub>2</sub>  
568 asphyxiation followed by cervical dislocation. For the intravenous challenge with TIGR4,  
569 C57BL/6 mice 5-7 weeks old (Charles River) were used. Mice were intraperitoneally inoculated  
570 with antibody treatments two hrs prior to pneumococcal infection, and infected intravenously  
571 with  $10^6$  CFUs of TIGR4 via the tail vein. Mice were monitored and euthanized as described  
572 above. For intranasal challenge studies with WU2, C57BL/6 mice 5-7 weeks old (Charles River)  
573 were used. For intranasal infection, mice were anesthetized by inhalation of 5% isoflurane and  
574 intranasally challenged with 40 µL of PBS containing  $10^6$  colony-forming units (CFUs) of WU2.  
575 Mice were either treated 2 hrs before infection or 24 hours post infection by intraperitoneally  
576 inoculating with antibody. In prophylactic studies, mice were euthanized based on the humane

577 endpoints above. For treatment studies, mice were euthanized when >30% of pre-infection body  
578 weight was lost or they were nonresponsive to manual stimulation or exhibited respiratory  
579 distress. Actual doses delivered to mice in all studies were determined by titering the bacteria  
580 after delivery.

581

#### 582 Opsonophagocytic killing assay

583 An opsonophagocytic killing assay was performed as described previously (89, 90) as adapted  
584 from an earlier protocol with modifications (91). TIGR4 stocks were incubated in triplicate wells  
585 in a 96-well round-bottom plate for 1 hour at 37°C with the indicated antibodies (10 µg of  
586 antibody per well in a final volume of 100 µL per well) in opsonization buffer B (OBB: sterile 1×  
587 PBS with Ca<sup>2+</sup>/Mg<sup>2+</sup>, 0.1% gelatin, and 5% heat-inactivated FetalClone [HyClone]), with heat-  
588 inactivated FetalClone-treated only TGR4 cells serving as a control. Cells of the human  
589 promyelocytic leukemia cell line HL-60 (ATCC) were cultured in RPMI with 10% heat-inactivated  
590 FetalClone and 1% l-glutamine. HL-60 cells were differentiated using 0.6% *N,N*-  
591 dimethylformamide (DMF [Fisher]) for 3 days before performing the OPA assay, harvested, and  
592 resuspended in OBB. Baby rabbit complement (Pel-Freez) was added to HL-60 cells at a 1:5  
593 final volume. The HL-60–complement mixture was added to the bacteria at 5 × 10<sup>5</sup> cells/well.  
594 The final reaction mixtures were incubated at 37°C for 1 hour with shaking. The reactions were  
595 stopped by incubating the samples on ice for approximately 20 min. Then 10 µL of each  
596 reaction mixture (triplicate) was diluted to a final volume of 50 µL and plated onto blood agar  
597 plates. Plates were incubated overnight at 30°C and counted the next day. The percentage of  
598 bacterial killing was calculated as each sample replicate normalized to the mean value obtained  
599 for the control samples, subtracted from 100 (with No Ab control samples representing 0%  
600 survival).

601

#### 602 Flow-based opsonophagocytosis assay

603 Pneumococcal cells were stained with pHRodo Succinimidyl Ester (Invitrogen) following  
604 manufacturer's protocol. Approximately,  $\sim 10^8$  CFUs of bacteria were fixed with 1%  
605 paraformaldehyde in PBS for 30 min at room temperature. Fixed bacteria were washed twice  
606 with PBS and resuspended with 0.5 mL freshly prepared 100 mM  $\text{NaHCO}_3$  (pH 8.5).  
607 Immediately before use, the contents of a 0.1 mg vial of pHRodo iFL amine-reactive dye were  
608 dissolved in 10  $\mu\text{L}$  of DMSO to prepare a 10 mM stock solution. pHRodo was diluted in the  
609 bacterial suspension at a final concentration of 0.1 mM, and bacteria were stained for 1 hr at  
610 room temperature. Stained bacteria were washed twice with Hank's Balanced Salt Solution with  
611  $\text{Ca}^{2+}$  and  $\text{Mg}^{2+}$  (HBSS, Gibco), and resuspended with 0.5 mL HBSS and stored in the dark at 4  
612  $^{\circ}\text{C}$ . The opsonophagocytosis assay was performed in 96 well U-bottom plates in a total volume  
613 of 120  $\mu\text{L}$  per well. First, 20  $\mu\text{L}$  of pHRodo labeled bacteria ( $\sim 10^7$  CFUs/well) was mixed with 40  
614  $\mu\text{L}$  of sterile filtered mAbs (50  $\mu\text{g}$ /well), and incubated on a shaker at 37  $^{\circ}\text{C}$  for 30 min. Bacteria  
615 were mixed with HBSS as a negative control, and purified human serum IgG was used as a  
616 positive control. Differentiated HL-60 cells were washed twice with HBSS and mixed with baby  
617 rabbit complement (Pel-Freez Biologicals) at a final concentration of 10% in each well.  
618 Following this, 60  $\mu\text{L}$  ( $1 \times 10^6$  viable cells) of differentiated HL60 cells and complement were  
619 added to the mixture of bacteria and antibodies, and incubated on a shaker at 37  $^{\circ}\text{C}$  for 60 min.  
620 The plate was then centrifuged at 1300 rpm for 5 min at 4  $^{\circ}\text{C}$  to remove the supernatant and the  
621 pellet was washed twice with 200  $\mu\text{L}$  of HBSS. After the second wash, the pellet was  
622 resuspended in a 50  $\mu\text{L}$  mixture of PE-anti-human CD11b (Southern Biotech, 10  $\mu\text{L}$ /million  
623 cells), Alexa Fluor 647-anti-human CD35 (BD Biosciences, 5  $\mu\text{L}$ /million cells), and DAPI  
624 (Invitrogen, 50 ng/million cells) in PBS containing 1% BSA. After a 30 min incubation at 4  $^{\circ}\text{C}$  in  
625 the dark, the plate was washed twice with 200  $\mu\text{L}$  of PBS, and cells were resuspended in 100  
626  $\mu\text{L}$  of PBS. Cells were analyzed with a NovoCyte Quanteon Flow Cytometer. Single fluorophore  
627 stained differentiated HL60 cells and pHRodo stained bacteria were used to calculate the

628 compensation matrix. A total of 10,000 ungated events were collected from each sample well,  
629 and data were analyzed by FlowJo.

630

631 **Acknowledgements**

632 These studies were supported by startup funding from the University of Georgia Office of the  
633 Vice President for Research, a Junior Faculty Seed Grant from the University of Georgia Office  
634 of Research, and National Institutes of Health grants 1K01OD026569 (JJM) and R01AI123383  
635 (FYA). Human subject studies were partially funded by the National Center for Advancing  
636 Translational Sciences award number UL1TR002378. FR was supported by National Institutes  
637 of Health NIGMS grant GM109435, Post-Baccalaureate Training in Infectious Diseases  
638 Research. The funders had no role in study design, data collection and analysis, decision to  
639 publish, or preparation of the manuscript. The content is solely the responsibility of the authors  
640 and does not necessarily represent the official views of the National Institutes of Health. We  
641 thank the University of Georgia Clinical and Translational Research Unit for assistance with  
642 donor identification and blood draws, and the University of Georgia Center for Tropical and  
643 Emerging Global Diseases and College of Veterinary Medicine flow cytometry cores for  
644 assistance with cell sorting and analysis.

645

646 **Disclosure**

647 J.H, A.D.G., F.R., F.Y.A., and J.J.M. are inventors on a provisional patent application filed  
648 describing the sequences of the monoclonal antibodies.

649

650 **Figure 1. Antibody responses and mAb binding properties to recombinant PhtD and**  
651 **PspA proteins.** (A) SDS-PAGE (left) and western blot (right) of purified recombinantly  
652 expressed PspA and PhtD. Both proteins were pure with the appearance of degradation  
653 products. (B) ELISA binding responses from the supernatant of stimulated B cells to  
654 recombinant PhtD and PspA proteins. (C) ELISA binding curves of anti-PhtD mAbs against  
655 recombinant PhtD protein. PspA16 was utilized as a negative control. > indicates no binding  
656 was observed at an OD<sub>405</sub> over 1 Abs at the highest concentration. (D) Binding of PspA16 to  
657 recombinant PspA. For (C) and (D), computed EC<sub>50</sub> values in ng/mL are reported from a non-  
658 linear regression curve fit (agonist). Data points indicate the average of four replicates from one  
659 of at least two independent experiments. Error bars indicate 95% confidence intervals.

| <b>mAb</b>                                 | <b>isotype</b>       | <b>V<sub>H</sub> gene<br/>(% mutation)</b> | <b>D<sub>H</sub></b> | <b>J<sub>H</sub></b> | <b>HCDR3<br/>sequence</b> | <b>V<sub>L</sub><br/>(% mutation)</b> | <b>J<sub>L</sub></b> | <b>LCDR3<br/>sequence</b> |
|--------------------------------------------|----------------------|--------------------------------------------|----------------------|----------------------|---------------------------|---------------------------------------|----------------------|---------------------------|
| <b>PhtD3</b>                               | IgG <sub>1</sub> , k | V1-69*18<br>(85%)                          | D3-16*01             | J3*01                | ARDGHIMRTTLSDAALDV        | V3-20*01 (91%)                        | J4*01                | QQYQNSPFT                 |
| <b>PhtD6</b>                               | IgG <sub>1</sub> , k | V1-8*01<br>(93%)                           | D2-15*01             | J5*02                | ARGPYWVENWFDT             | V1-39*01 (92%)                        | J1*01                | QQSYSNQKT                 |
| <b>PhtD7</b>                               | IgG1, λ              | V1-2*02<br>(91%)                           | D3-16*01             | J4*02                | ARVLRGSYDFRGNYPHDFDY      | V4-69*01 (88%)                        | J3*02                | QTWDTGLQGV                |
| <b>PhtD8</b>                               | IgG <sub>1</sub> , λ | V1-2*02<br>(93%)                           | D2-15*01             | J4*02                | ARGGTLDH                  | V4-69*01 (94%)                        | J3*02                | HTWVTNIHLV                |
| <b>PspA16</b>                              | IgG <sub>1</sub> , k | V1-2*02<br>(93%)                           | D3-10*01             | J1*01                | ARAWAPGAEYLHH             | V3-20*01 (94%)                        | J3*01                | QQHDHSPFT                 |
| Analysis was performed using IMGT/V-Quest. |                      |                                            |                      |                      |                           |                                       |                      |                           |



661 **Figure 2. Epitope mapping of anti-PhtD mAbs.** (A) SDS-PAGE of the purified maltose binding  
662 protein (MBP) PhtD fragment fusion proteins. Each fusion protein was pure after purification  
663 with the exception of free MBP. (B) ELISA binding curves of the PhtD mAbs to each MBP-PhtD  
664 fragment. A summary of the binding curves is displayed below the binding curves, where cells  
665 colored in blue indicate binding, and those colored in white indicate no binding. Data points  
666 indicate the average of four replicates from one of at least two independent experiments. Error  
667 bars indicate 95% confidence intervals. (C) An example of an epitope mapping experiment for  
668 the anti-PhtD mAbs. The top graph displays the signal from biolayer interferometry of the first  
669 mAb loaded onto immobilized PhtD protein. The signal for each mAb is colored according to the  
670 legend. The bottom graph displays the signal from loading of the second mAb in the presence  
671 of the first mAb, mAb PhtD3 in this example. A decrease in signal compared to the top graph is  
672 observed for mAbs PhtD3 and PhtD8, as mAb PhtD3 competes with itself, and mAbs PhtD3 and  
673 PhtD6 have partially overlapping epitopes. (D) Epitope mapping of the PhtD-specific mAbs.  
674 Data indicate the percent binding of the competing antibody in the presence of the primary  
675 antibody, compared with the competing antibody alone. Cells filled in black indicate full  
676 competition, in which  $\leq 33\%$  of the uncompeted signal was observed; cells in gray indicate  
677 intermediate competition, in which the signal was between 33% and 66%; and cells in white  
678 indicate noncompetition, where the signal was  $\geq 66\%$ .

679

680 **Figure 3. Epitope mapping of PspA16.** (A) SDS-PAGE of recombinant MBP PspA fragment  
681 fusion proteins. Fragments 1-2 and 4-5 purified well, with only visible MBP protein as a  
682 contaminant. PspA fragment 3 has multiple co-purified bands and/or degradation products. (B)  
683 ELISA binding curves for PspA16 to each fragment. PspA16 bound to fragment 1 and fragment  
684 4, but not others, suggesting the epitope lies within amino acids 1-247. Data points indicate the  
685 average of four replicates from one of at least two independent experiments. Error bars indicate  
686 95% confidence intervals.  
687

688 **Figure 4. Serotype breadth of the isolated mAbs.** (A) Western blot of TIGR4 and TCH8431  
689 strains with PspA16 and PhtD3 as the primary antibodies. In the western blot for PspA16, PspA  
690 fragment 1-438 fused to the MBP was used as the positive control, and MBP was used as the  
691 negative control. In the PhtD3 western blot, recombinant PhtD was used as the positive control,  
692 and *E. coli* lysates were used as the negative control. (B) Area under the curve (AUC) values  
693 calculated from ELISA binding curves of serially diluted mAbs against plates coated with fixed  
694 bacteria. The ELISA binding curves were the the average of four data points from one of at least  
695 two independent experiments. The baseline for the AUC calculation was set as the average of  
696 the signal for the highest concentration (20 µg/mL) of the negative control mAb MPV314. Error  
697 bars are the standard error from the AUC calculation. (C) Example gating strategy for antibody  
698 binding to bacteria. Bacteria were labeled with CFSE, and antibodies were labeled with APC.  
699 (D) Heat map and percentages for antibody binding to each pneumococcal serotype. Data are  
700 averages from 3-4 experiments, and are the percent of bacteria that are APC-positive. MPV314  
701 and MPV414 are human antibodies specific to the human metapneumovirus fusion protein, and  
702 these were used as negative controls.  
703

704 **Figure 5. Protective efficacy of anti-PhtD mAbs.** (A) ELISA binding curve of mAb PhtD3, the  
705 isotype-switched mAb PhtD-IgG<sub>2a</sub>, and an IgG<sub>2a</sub> isotype control. Data points indicate the  
706 average of four replicates from one of at least two independent experiments. Error bars indicate  
707 95% confidence intervals. (B) Prophylactic efficacy of mAb PhtD3 in an intranasal infection  
708 model of pneumococcal serotype 3 (strain WU2) in C57BL/6 mice. \*\*, P=0.0012, ns=not  
709 significant via log-rank (Mantel-Cox) test. n=10 mice/group. (C) Prophylactic efficacy of mAb  
710 PhtD8 in an intranasal infection model of pneumococcal serotype 3 (strain WU2) in C57BL/6  
711 mice. \*\*\*, P=0.0009, ns=not significant via log-rank (Mantel-Cox) test. n=10 mice/group. (C)  
712 Prophylactic efficacy of mAb PhtD3 in an intranasal infection model of pneumococcal serotype 4  
713 (strain TIGR4) in CBA/N mice. \*\*, P=0.0045 via log-rank (Mantel-Cox) test. n=15 mice/group.  
714 (D) Prophylactic efficacy of mAb PhtD3 in an intravenous infection model of pneumococcal  
715 serotype 4 (strain TIGR4) in C57BL/6 mice. \*\*P=0.0101 via log-rank (Mantel-Cox) test. n=13-15  
716 mice/group. (E) Treatment efficacy of mAb PhtD3 in an intranasal infection model of  
717 pneumococcal serotype 3 (strain WU2) in C57BL/6 mice. \*\*\*P=0.0002, ns=not significant via  
718 log-rank (Mantel-Cox) test. n=20 mice/group.

719

720

721 **Figure 6. Opsonophagocytic activity of PhtD-specific human mAbs.** (A) mAbs and serum  
722 were tested in a standard OPA assay using differentiated HL-60 cells. Bacteria were opsonized  
723 with antibodies, and subsequently HL-60 cells were added before plating onto blood agar  
724 plates. Plates were incubated overnight and CFUs counted. Data are averages of three  
725 replicates from one experiment. Error bars represent the range. % Bacterial Killing was  
726 calculated as the counted CFU value of each triplicate normalized against the average of the No  
727 Ab control. One-way ANOVA analysis with Dunnett's multiple comparisons test was used to  
728 determine significance. ns=not significant, \*\*\*\*P<0.0001. (B) mAbs and serum were tested in a  
729 flow-based opsonophagocytosis assay. pHRodo-labeled bacteria were opsonized with  
730 antibodies, and incubated with HL-60 cells before being subjected to analysis by flow cytometry.  
731 Data indicate the percent of CD38+CD11b+ HL-60 cells that are pHRodo+. Each bar graph is  
732 the average of three experimental replicates and error bars are the standard deviation. ns=not  
733 significant, \*\*\*P=0.0001-0.0006, \*\*\*\*P<0.0001 via one-way ANOVA analysis with Dunnett's  
734 multiple comparisons test. MPV414 is a human mAb specific to the human metapneumovirus  
735 fusion protein.  
736

737 **References**

738

- 739 1. Levine OS, O'Brien KL, Knoll M, Adegbola RA, Black S, Cherian T, Dagan R, Goldblatt D,  
740 Grange A, Greenwood B, Hennessy T, Klugman KP, Madhi SA, Mulholland K, Nohynek  
741 H, Santosham M, Saha SK, Scott JA, Sow S, Whitney CG, Cutts F. 2006. Pneumococcal  
742 vaccination in developing countries. *Lancet* 367:1880–1882.
- 743 2. WHO. 2003. Pneumococcal vaccines. *Wkly Epidemiol Rec* 78:110–119.
- 744 3. Practices AC on I. 2000. Preventing pneumococcal disease among infants and young  
745 children. *MMWR Recomm Rep* 49:1–35.
- 746 4. van der Poll T, Opal SM. 2009. Pathogenesis, treatment, and prevention of  
747 pneumococcal pneumonia. *Lancet* 374:1543–1556.
- 748 5. Bridy-Pappas AE, Margolis MB, Center KJ, Isaacman DJ. 2005. *Streptococcus*  
749 *pneumoniae*: description of the pathogen, disease epidemiology, treatment, and  
750 prevention. *Pharmacotherapy* 25:1193–212.
- 751 6. Williams BG, Gouws E, Boschi-pinto C, Bryce J, Dye C. 2002. Estimates of world-wide  
752 distribution of child deaths from acute respiratory infections died from ARI in 2000 , 70 %  
753 of them in Africa and. *Lancet Infect Dis* 2:25–32.
- 754 7. Sulikowska A, Grzesiowski P, Sadowy E, Fielt J, Hryniewicz W. 2004. Characteristics of  
755 *Streptococcus pneumoniae*, *Haemophilus influenzae*, and *Moraxella catarrhalis* isolated  
756 from the nasopharynges of asymptomatic children and molecular analysis of *S.*  
757 *pneumoniae* and *H. influenzae* strain replacement in the nasopharynx. *J Clin Microbiol*  
758 42:3942–3949.
- 759 8. Simell B, Auranen K, Käyhty H, Goldblatt D, Dagan R, O'Brien KL. 2012. The  
760 fundamental link between pneumococcal carriage and disease. *Expert Rev Vaccines*  
761 11:841–855.
- 762 9. Cardozo DM, Nascimento-Carvalho CM, Andrade AL, Silvany-Neto AM, Daltro CH,

- 763 Brandao MA, Brandao AP, Brandileone MC. 2008. Prevalence and risk factors for  
764 nasopharyngeal carriage of *Streptococcus pneumoniae* among adolescents. *J Med*  
765 *Microbiol* 57:185–189.
- 766 10. Shrestha S, Foxman B, Weinberger DM, Steiner C, Viboud C, Rohani P. 2013. Identifying  
767 the interaction between influenza and pneumococcal pneumonia using incidence data.  
768 *Sci Transl Med* 5:191ra84-191ra84.
- 769 11. Zhu X, Ge Y, Wu T, Zhao K, Chen Y, Wu B, Zhu F, Zhu B, Cui L. 2020. Co-infection with  
770 respiratory pathogens among COVID-2019 cases. *Virus Res* 285:198005.
- 771 12. Weinberger DM, Dagan R, Givon-Lavi N, Regev-Yochay G, Malley R, Lipsitch M. 2008.  
772 Epidemiologic evidence for serotype-specific acquired immunity to pneumococcal  
773 carriage. *J Infect Dis* 197:1511–1518.
- 774 13. Goldblatt D, Hussain M, Andrews N, Ashton L, Virta C, Melegaro A, Pebody R, George R,  
775 Soininen A, Edmunds J, Gay N, Kayhty H, Miller E. 2005. Antibody responses to  
776 nasopharyngeal carriage of *Streptococcus pneumoniae* in adults: a longitudinal  
777 household study. *J Infect Dis* 192:387–93.
- 778 14. McCool TL, Cate TR, Moy G, Weiser JN. 2002. The immune response to pneumococcal  
779 proteins during experimental human carriage. *J Exp Med* 195:359–365.
- 780 15. Prevaes SM, van Warmel WJ, de Vogel CP, Veenhoven RH, van Gils EJ, van Belkum A,  
781 Sanders EA, Bogaert D. 2012. Nasopharyngeal colonization elicits antibody responses to  
782 staphylococcal and pneumococcal proteins that are not associated with a reduced risk of  
783 subsequent carriage. *Infect Immun* 80:2221-2186–2193.
- 784 16. Turner P, Turner C, Green N, Ashton L, Lwe E, Jankhot A, Day NP, White NJ, Nosten F,  
785 Goldblatt D. 2013. Serum antibody responses to pneumococcal colonization in the first 2  
786 years of life: Results from an SE Asian longitudinal cohort study. *Clin Microbiol Infect*  
787 19:E551–E558.
- 788 17. Zhang Q, Bernatoniene J, Bagrade L, Pollard AJ, Mitchell TJ, Paton JC, Finn A. 2006.

- 789 Serum and mucosal antibody responses to pneumococcal protein antigens in children:  
790 Relationships with carriage status. *Eur J Immunol* 36:46–57.
- 791 18. Mureithi MW, Finn A, Ota MO, Zhang Q, Davenport V, Mitchell TJ, Williams NA,  
792 Adegbola RA, Heyderman RS. 2009. T cell memory response to pneumococcal protein  
793 antigens in an area of high pneumococcal carriage and disease. *J Infect Dis* 200:783–  
794 793.
- 795 19. Wright AKA, Bangert M, Gritzfeld JF, Ferreira DM, Jambo KC, Wright AD, Collins AM,  
796 Gordon SB. 2013. Experimental human pneumococcal carriage augments IL-17A-  
797 dependent T-cell defence of the lung. *PLoS Path* e1003274.
- 798 20. Simell B, Lahdenkari M, Reunanen A, Käyhty H, Väkeväinen M. 2008. Effects of ageing  
799 and gender on naturally acquired antibodies to pneumococcal capsular polysaccharides  
800 and virulence-associated proteins. *Clin Vacc Immunol* 15:1391–1397.
- 801 21. Ganaie F, Saad JS, McGee L, van Tonder AJ, Bentley SD, Lo SW, Gladstone RA, Turner  
802 P, Keenan JD, Breiman RF, Nahm MH. 2020. A New Pneumococcal Capsule Type, 10D,  
803 is the 100th Serotype and Has a Large *cps* Fragment from an Oral  
804 *Streptococcus*. *MBio* 11:e00937-20.
- 805 22. Geno KA, Gilbert GL, Song JY, Skovsted IC, Klugman KP, Jones C, Konradsen HB,  
806 Nahm MH. 2015. Pneumococcal capsules and their types: Past, present, and future. *Clin*  
807 *Microbiol Rev* 28:871–899.
- 808 23. Chen Z, Cox KS, Tang A, Roman J, Fink M, Kaufhold RM, Guan L, Xie A, Boddicker MA,  
809 McGuinness D, Xiao X, Li H, Skinner JM, Verch T, Retzlaff M, Vora KA. 2018. Human  
810 monoclonal antibodies isolated from a primary pneumococcal conjugate vaccinee  
811 demonstrates the expansion of an antigen-driven hypermutated memory B cell response.  
812 *BMC Infect Dis* 18:613.
- 813 24. Wantuch PL, Avci FY. 2018. Current status and future directions of invasive  
814 pneumococcal diseases and prophylactic approaches to control them. *Hum Vaccines*



- 815 Immunother 14:2303–2309.
- 816 25. Linley E, Bell A, Gritzfeld JF, Borrow R. 2019. Should pneumococcal serotype 3 be  
817 included in serotype-specific immunoassays? *Vaccines* 7:doi: 10.3390/vaccines7010004.
- 818 26. Lo SW, Gladstone RA, van Tonder AJ, Lees JA, du Plessis M, Benisty R, Givon-Lavi N,  
819 Hawkins PA, Cornick JE, Kwambana-Adams B, Law PY, Ho PL, Antonio M, Everett DB,  
820 Dagan R, von Gottberg A, Klugman KP, McGee L, Breiman RF, Bentley SD, Brooks AW,  
821 Corso A, Davydov A, Maguire A, Pollard A, Kiran A, Skoczynska A, Moiane B, Beall B,  
822 Sigauque B, Aanensen D, Lehmann D, Faccone D, Foster-Nyarko E, Bojang E, Egorova  
823 E, Voropaeva E, Sampane-Donkor E, Sadowy E, Bigogo G, Mucavele H, Belabbès H,  
824 Diawara I, Moïsi J, Verani J, Keenan J, Nair Thulasee Bhai JN, Ndlangisa KM, Zerouali  
825 K, Ravikumar KL, Titov L, De Gouveia L, Alaerts M, Ip M, de Cunto Brandileone MC,  
826 Hasanuzzaman M, Paragi M, Nurse-Lucas M, Ali M, Elmdaghri N, Croucher N, Wolter N,  
827 Porat N, Köseoglu Eser Ö, Akpaka PE, Turner P, Gagetti P, Tientcheu PE, Carter PE,  
828 Mostowy R, Kandasamy R, Ford R, Henderson R, Malaker R, Shakoor S, Grassi Almeida  
829 SC, Saha SK, Doiphode S, Madhi SA, Devi Sekaran S, Srifuengfung S, Obaro S, Clarke  
830 SC, Nzenze SA, Kastrin T, Ochoa TJ, Balaji V, Hryniewicz W, Urban Y. 2019.  
831 Pneumococcal lineages associated with serotype replacement and antibiotic resistance in  
832 childhood invasive pneumococcal disease in the post-PCV13 era: an international whole-  
833 genome sequencing study. *Lancet Infect Dis* 19:759–769.
- 834 27. Daniels CC, Rogers PD, Shelton CM. 2016. A review of pneumococcal vaccines: Current  
835 polysaccharide vaccine recommendations and future protein antigens. *J Pediatr*  
836 *Pharmacol Ther* 21:27–35.
- 837 28. Lagousi T, Basdeki P, Routsias J, Spoulou V. 2019. Novel Protein-Based Pneumococcal  
838 Vaccines: Assessing the Use of Distinct Protein Fragments Instead of Full-Length  
839 Proteins as Vaccine Antigens. *Vaccines* 7:9.
- 840 29. Adamou JE, Heinrichs JH, Erwin AL, Walsh W, Gayle T, Dormitzer M, Dagan R, Brewah

- 841 YA, Barren P, Lathigra R, Langermann S, Koenig S, Johnson S. 2001. Identification and  
842 characterization of a novel family of pneumococcal proteins that are protective against  
843 sepsis. *Infect Immun* 69:949–958.
- 844 30. Rioux S, Neyt C, Di Paolo E, Turpin L, Charland N, Labbé S, Mortier MC, Mitchell TJ,  
845 Feron C, Martin D, Poolman JT. 2011. Transcriptional regulation, occurrence and putative  
846 role of the Pht family of *Streptococcus pneumoniae*. *Microbiology* 157:335–348.
- 847 31. Yun KW, Lee H, Choi EH, Lee HJ. 2015. Diversity of pneumolysin and pneumococcal  
848 histidine triad protein D of *Streptococcus pneumoniae* isolated from invasive diseases in  
849 Korean children. *PLoS One* 10:e0134055.
- 850 32. Kawaguchiya M, Urushibara N, Aung MS, Shinagawa M, Takahashi S, Kobayashi N.  
851 2019. Prevalence of Various Vaccine Candidate Proteins in Clinical Isolates of  
852 *Streptococcus pneumoniae*: Characterization of the Novel Pht Fusion Proteins PhtA/B  
853 and PhtA/D. *Pathog (Basel, Switzerland)* 8:162.
- 854 33. Blumental S, Granger-Farbos A, Moïsi JC, Soullié B, Leroy P, Njanpop-Lafourcade B-M,  
855 Yaro S, Nacro B, Hallin M, Koeck J-L. 2015. Virulence Factors of *Streptococcus*  
856 *pneumoniae*. Comparison between African and French Invasive Isolates and Implication  
857 for Future Vaccines. *PLoS One* 10:e0133885.
- 858 34. Rioux S, Neyt C, Di Paolo E, Turpin L, Charland N, Labbé S, Mortier M-C, Mitchell TJ,  
859 Feron C, Martin D, Poolman JT. 2011. Transcriptional regulation, occurrence and putative  
860 role of the Pht family of *Streptococcus pneumoniae*. *Microbiology* 157:336–348.
- 861 35. Plumtre CD, Ogunniyi AD, Paton JC. 2013. Surface association of Pht proteins of  
862 *Streptococcus pneumoniae*. *Infect Immun* 2013/07/22. 81:3644–3651.
- 863 36. Kallio A, Sepponen K, Hermand P, Denoël P, Godfroid F, Melin M. 2014. Role of Pht  
864 proteins in attachment of *Streptococcus pneumoniae* to respiratory epithelial cells. *Infect*  
865 *Immun* 2014/02/03. 82:1683–1691.
- 866 37. Eijkelkamp BA, Pederick VG, Plumtre CD, Harvey RM, Hughes CE, Paton JC, McDevitt

- 867 CA. 2016. The First Histidine Triad Motif of PhtD Is Critical for Zinc Homeostasis in  
868 *Streptococcus pneumoniae*. *Infect Immun* 84:407 LP – 415.
- 869 38. Luo Z, Pederick VG, Paton JC, McDevitt CA, Kobe B. 2018. Structural characterisation of  
870 the HT3 motif of the polyhistidine triad protein D from *Streptococcus pneumoniae*. *FEBS*  
871 *Lett* 592:2341–2350.
- 872 39. Bersch B, Bougault C, Roux L, Favier A, Vernet T, Durmort C. 2013. New Insights into  
873 Histidine Triad Proteins: Solution Structure of a *Streptococcus pneumoniae* PhtD Domain  
874 and Zinc Transfer to AdcAll. *PLoS One* 8:e81168.
- 875 40. Godfroid F, Hermand P, Verlant V, Denoël P, Poolman JT. 2011. Preclinical Evaluation of  
876 the Pht Proteins as Potential Cross-Protective Pneumococcal Vaccine Antigens. *Infect*  
877 *Immun* 79:238 LP – 245.
- 878 41. Wizemann TM, Heinrichs JH, Adamou JE, Erwin AL, Kunsch C, Choi GH, Barash SC,  
879 Rosen CA, Masure HR, Tuomanen E, Gayle A, Brewah YA, Walsh W, Barren P, Lathigra  
880 R, Hanson M, Langermann S, Johnson S, Koenig S. 2001. Use of a whole genome  
881 approach to identify vaccine molecules affording protection against *Streptococcus*  
882 *pneumoniae* infection. *Infect Immun* 69:1593–1598.
- 883 42. Denoël P, Philipp MT, Doyle L, Martin D, Carletti G, Poolman JT. 2011. A protein-based  
884 pneumococcal vaccine protects rhesus macaques from pneumonia after experimental  
885 infection with *Streptococcus pneumoniae*. *Vaccine* 29:5495–5501.
- 886 43. Plumptre CD, Ogunniyi AD, Paton JC. 2013. Vaccination against *Streptococcus*  
887 *pneumoniae* Using Truncated Derivatives of Polyhistidine Triad Protein D. *PLoS One*  
888 8:e78916.
- 889 44. André GO, Assoni L, Rodriguez D, Leite LCC, dos Santos TEP, Ferraz LFC, Converso  
890 TR, Darrieux M. 2020. Immunization with PhtD truncated fragments reduces  
891 nasopharyngeal colonization by *Streptococcus pneumoniae*. *Vaccine* 38:4146–4153.
- 892 45. Hammitt LL, Campbell JC, Borys D, Weatherholtz RC, Reid R, Goklish N, Moulton LH,

- 893 Traskine M, Song Y, Swinnen K, Santosham M, Brien KLO. 2019. Efficacy, safety and  
894 immunogenicity of a pneumococcal protein-based vaccine co-administered with 13-valent  
895 pneumococcal conjugate vaccine against acute otitis media in young children: A phase  
896 IIb randomized study. *Vaccine* <https://doi.org/10.1016/j.vaccine.2019.08.071>.
- 897 46. Visan L, Rouleau N, Proust E, Peyrot L, Donadieu A, Ochs M. 2018. Antibodies to PcpA  
898 and PhtD protect mice against *Streptococcus pneumoniae* by a macrophage- and  
899 complement-dependent mechanism. *Hum Vaccin Immunother* 14:489–494.
- 900 47. Kaur R, Surendran N, Ochs M, Pichichero ME. 2014. Human antibodies to PhtD, PcpA,  
901 and ply reduce adherence to human lung epithelial cells and murine nasopharyngeal  
902 colonization by *Streptococcus pneumoniae*. *Infect Immun* 82:5069–5075.
- 903 48. Brookes RH, Ming M, Williams K, Hopfer R, Gurunathan S, Gallichan S, Tang M, Ochs  
904 MM. 2015. Passive protection of mice against *Streptococcus pneumoniae* challenge by  
905 naturally occurring and vaccine-induced human anti-PhtD antibodies. *Hum Vaccin  
906 Immunother* 11:1836–1839.
- 907 49. Rosenow C, Ryan P, Weiser JN, Johnson S, Fontan P, Ortqvist A, Masure HR. 1997.  
908 Contribution of novel choline-binding proteins to adherence, colonization and  
909 immunogenicity of *Streptococcus pneumoniae*. *Mol Microbiol* 25:819–829.
- 910 50. Hollingshead SK, Baril L, Ferro S, King J, Coan P, Briles DE, Group TPPEs. 2006.  
911 Pneumococcal surface protein A (PspA) family distribution among clinical isolates from  
912 adults over 50 years of age collected in seven countries. *J Med Microbiol* 55:215–221.
- 913 51. Briles DE, Yother J, McDaniel LS. 1988. Role of pneumococcal surface protein A in the  
914 virulence of *Streptococcus pneumoniae*. *Rev Infect Dis* 10 Suppl 2:S372-4.
- 915 52. Bosarge JR, Watt JM, McDaniel DO, Swiatlo E, McDaniel LS. 2001. Genetic  
916 immunization with the region encoding the alpha-helical domain of PspA elicits protective  
917 immunity against *Streptococcus pneumoniae*. *Infect Immun* 69:5456–5463.
- 918 53. McDaniel LS, Sheffield JS, Delucchi P, Briles DE. 1991. PspA, a surface protein of

- 919 Streptococcus pneumoniae, is capable of eliciting protection against pneumococci of  
920 more than one capsular type. *Infect Immun* 59:222–228.
- 921 54. McDaniel LS, McDaniel DO, Hollingshead SK, Briles DE. 1998. Comparison of the PspA  
922 sequence from *Streptococcus pneumoniae* EF5668 to the previously identified PspA  
923 sequence from strain Rx1 and ability of PspA from EF5668 to elicit protection against  
924 pneumococci of different capsular types. *Infect Immun* 66:4748–4754.
- 925 55. Kong IG, Sato A, Yuki Y, Nochi T, Takahashi H, Sawada S, Mejima M, Kurokawa S,  
926 Okada K, Sato S, Briles DE, Kunisawa J, Inoue Y, Yamamoto M, Akiyoshi K, Kiyono H.  
927 2013. Nanogel-Based PspA Intranasal Vaccine Prevents Invasive Disease and Nasal  
928 Colonization by *Streptococcus pneumoniae*; *Infect Immun* 81:1625 LP – 1634.
- 931 56. Piao Z, Akeda Y, Takeuchi D, Ishii KJ, Ubukata K, Briles DE, Tomono K, Oishi K. 2014.  
932 Protective properties of a fusion pneumococcal surface protein A (PspA) vaccine against  
933 pneumococcal challenge by five different PspA clades in mice. *Vaccine* 32:5607–5613.
- 934 57. Fukuyama Y, Yuki Y, Katakai Y, Harada N, Takahashi H, Takeda S, Mejima M, Joo S,  
935 Kurokawa S, Sawada S, Shibata H, Park EJ, Fujihashi K, Briles DE, Yasutomi Y,  
936 Tsukada H, Akiyoshi K, Kiyono H. 2015. Nanogel-based pneumococcal surface protein A  
937 nasal vaccine induces microRNA-associated Th17 cell responses with neutralizing  
938 antibodies against *Streptococcus pneumoniae* in macaques. *Mucosal Immunol* 8:1144–  
939 1153.
- 940 58. Arulanandam BP, Lynch JM, Briles DE, Hollingshead S, Metzger DW. 2001. Intranasal  
941 vaccination with pneumococcal surface protein A and interleukin-12 augments antibody-  
942 mediated opsonization and protective immunity against *Streptococcus pneumoniae*  
943 infection. *Infect Immun* 69:6718–6724.
- 944 59. Hollingshead SK, Becker R, Briles DE. 2000. Diversity of PspA: mosaic genes and

- 945 evidence for past recombination in *Streptococcus pneumoniae*. *Infect Immun* 68:5889–  
946 5900.
- 947 60. Khan N, Jan AT. 2017. Towards Identifying Protective B-Cell Epitopes: The PspA Story .  
948 *Front Microbiol* .
- 949 61. Ren B, Szalai AJ, Hollingshead SK, Briles DE. 2004. Effects of PspA and antibodies to  
950 PspA on activation and deposition of complement on the pneumococcal surface. *Infect*  
951 *Immun* 72:114–122.
- 952 62. Mukerji R, Mirza S, Roche AM, Widener RW, Croney CM, Rhee D-K, Weiser JN, Szalai  
953 AJ, Briles DE. 2012. Pneumococcal surface protein A inhibits complement deposition on  
954 the pneumococcal surface by competing with the binding of C-reactive protein to cell-  
955 surface phosphocholine. *J Immunol* 2012/10/26. 189:5327–5335.
- 956 63. Tu A-HT, Fulgham RL, McCrory MA, Briles DE, Szalai AJ. 1999. Pneumococcal Surface  
957 Protein A Inhibits Complement Activation by *Streptococcus pneumoniae*. *Infect Immun*  
958 67:4720 LP – 4724.
- 959 64. Håkansson A, Roche H, Mirza S, McDaniel LS, Brooks-Walter A, Briles DE. 2001.  
960 Characterization of binding of human lactoferrin to pneumococcal surface protein A.  
961 *Infect Immun* 69:3372–3381.
- 962 65. Senkovich O, Cook WJ, Mirza S, Hollingshead SK, Protasevich II, Briles DE,  
963 Chattopadhyay D. 2007. Structure of a Complex of Human Lactoferrin N-lobe with  
964 Pneumococcal Surface Protein A Provides Insight into Microbial Defense Mechanism. *J*  
965 *Mol Biol* 370:701–713.
- 966 66. Nabors GS, Braun PA, Herrmann DJ, Heise ML, Pyle DJ, Gravenstein S, Schilling M,  
967 Ferguson LM, Hollingshead SK, Briles DE, Becker RS. 2000. Immunization of healthy  
968 adults with a single recombinant pneumococcal surface protein A (PspA) variant  
969 stimulates broadly cross-reactive antibodies to heterologous PspA molecules. *Vaccine*  
970 18:1743–1754.

- 971 67. Briles DE, Hollingshead SK, King J, Swift A, Braun PA, Park MK, Ferguson LM, Nahm  
972 MH, Nabors GS. 2000. Immunization of Humans with Recombinant Pneumococcal  
973 Surface Protein A (rPspA) Elicits Antibodies That Passively Protect Mice from Fatal  
974 Infection with *Streptococcus pneumoniae* Bearing Heterologous PspA. *J Infect Dis*  
975 182:1694–1701.
- 976 68. Wilcox MH, Gerding DN, Poxton IR, Kelly C, Nathan R, Birch T, Cornely OA, Rahav G,  
977 Bouza E, Lee C, Jenkin G, Jensen W, Kim YS, Yoshida J, Gabryelski L, Pedley A, Eves  
978 K, Tipping R, Guris D, Kartsonis N, Dorr MB. 2017. Bezlotoxumab for prevention of  
979 recurrent *Clostridium difficile* infection. *N Engl J Med* 376:305–317.
- 980 69. Wilson R, Cohen JM, Reglinski M, Jose RJ, Chan WY, Marshall H, de Vogel C, Gordon  
981 S, Goldblatt D, Petersen FC, Baxendale H, Brown JS. 2017. Naturally acquired human  
982 immunity to pneumococcus is dependent on antibody to protein antigens. *PLoS Pathog*  
983 13:1–26.
- 984 70. Simell B, Ahokas P, Lahdenkari M, Poolman J, Henckaerts I, Kilpi TM, Käyhty H. 2009.  
985 Pneumococcal carriage and acute otitis media induce serum antibodies to pneumococcal  
986 surface proteins CbpA and PhtD in children. *Vaccine* 27:4615–4621.
- 987 71. Bar-Peled Y, Diaz D, Pena-Briseno A, Murray J, Huang J, Tripp RA, Mousa JJ. 2019. A  
988 potent neutralizing site III-specific human antibody neutralizes human metapneumovirus  
989 in vivo. *J Virol* 93:e00342-19.
- 990 72. Wantuch PL, Avci FY. 2019. Invasive pneumococcal disease in relation to vaccine type  
991 serotypes. *Hum Vaccin Immunother*.
- 992 73. Sandgren A, Albiger B, Orihuela CJ, Tuomanen E, Normark S, Henriques-Normark B.  
993 2005. Virulence in Mice of Pneumococcal Clonal Types with Known Invasive Disease  
994 Potential in Humans. *J Infect Dis* 192:791–800.
- 995 74. Romero-Steiner S, Frasch CE, Carlone G, Fleck RA, Goldblatt D, Nahm MH. 2006. Use  
996 of opsonophagocytosis for serological evaluation of pneumococcal vaccines. *Clin*

- 997 Vaccine Immunol 13:165–169.
- 998 75. Paschall A V, Middleton DR, Avci FY. 2019. Opsonophagocytic Killing Assay to Assess  
999 Immunological Responses Against Bacterial Pathogens. JoVE e59400.
- 1000 76. Pilishvili T, Bennett NM. 2015. Pneumococcal disease prevention among adults:  
1001 Strategies for the use of pneumococcal vaccines. Vaccine 33:D60–D65.
- 1002 77. Fabbrini M, Sammicheli C, Margarit I, Maione D, Grandi G, Giuliani MM, Mori E, Nuti S.  
1003 2012. A new flow-cytometry-based opsonophagocytosis assay for the rapid measurement  
1004 of functional antibody levels against Group B Streptococcus. J Immunol Methods  
1005 378:11–19.
- 1006 78. Huang J, Diaz D, Mousa JJ. 2020. Antibody recognition of the Pneumovirus fusion  
1007 protein trimer interface. PLOS Pathog 16:e1008942.
- 1008 79. Lagousi T, Routsias J, Piperi C, Tsakris A, Chrousos G, Theodoridou M, Spoulou V.  
1009 2015. Discovery of Immunodominant B Cell Epitopes within Surface Pneumococcal  
1010 Virulence Proteins in Pediatric Patients with Invasive Pneumococcal Disease. J Biol  
1011 Chem2015/09/22. 290:27500–27510.
- 1012 80. McDaniel LS, Ralph BA, McDaniel DO, Briles DE. 1994. Localization of protection-  
1013 eliciting epitopes on PspA of Streptococcus pneumoniae between amino acid residues  
1014 192 and 260. Microb Pathog 17:323–337.
- 1015 81. Kolberg J, Aase A, Rødal G, Littlejohn JE, Jedrzejewski MJ. 2003. Epitope mapping of  
1016 pneumococcal surface protein A of strain Rx1 using monoclonal antibodies and molecular  
1017 structure modelling. FEMS Immunol Med Microbiol 39:265–273.
- 1018 82. Hollingshead SK, Becker R, Briles DE. 2000. Diversity of PspA: Mosaic genes and  
1019 evidence for past recombination in Streptococcus pneumoniae. Infect Immun 68:5889–  
1020 5900.
- 1021 83. Keller LE, Robinson DA, McDaniel LS. 2016. Nonencapsulated Streptococcus  
1022 pneumoniae: Emergence and Pathogenesis. MBio 7:e01792–e01792.



- 1023 84. Doyle CR, Pirofski L. 2016. Reduction of Streptococcus pneumoniae Colonization and  
1024 Dissemination by a Nonopsonic Capsular Polysaccharide Antibody. *MBio* 7:e02260-15.
- 1025 85. Tian H, Weber S, Thorkildson P, Kozel TR, Pirofski LA. 2009. Efficacy of opsonic and  
1026 nonopsonic serotype 3 pneumococcal capsular polysaccharide-specific monoclonal  
1027 antibodies against intranasal challenge with streptococcus pneumoniae in mice. *Infect*  
1028 *Immun* 77:1502–1513.
- 1029 86. Khan MN, Pichichero ME. 2012. Vaccine candidates PhtD and PhtE of Streptococcus  
1030 pneumoniae are adhesins that elicit functional antibodies in humans. *Vaccine*2012/02/17.  
1031 30:2900–2907.
- 1032 87. Guthmiller JJ, Dugan HL, Neu KE, Lan LY-L, Wilson PC. 2019. An Efficient Method to  
1033 Generate Monoclonal Antibodies from Human B Cells *BT - Human Monoclonal*  
1034 *Antibodies: Methods and Protocols*, p. 109–145. *In* Steinitz, M (ed.), . Springer New York,  
1035 New York, NY.
- 1036 88. Brochet X, Lefranc MP, Giudicelli V. 2008. IMGT/V-QUEST: the highly customized and  
1037 integrated system for IG and TR standardized V-J and V-D-J sequence analysis. *Nucleic*  
1038 *Acids Res* 36:503–508.
- 1039 89. Middleton DR, Paschall A V, Duke JA, Avci FY. 2018. Enzymatic Hydrolysis of  
1040 Pneumococcal Capsular Polysaccharide Renders the Bacterium Vulnerable to Host  
1041 Defense. *Infect Immun* 86.
- 1042 90. Paschall AV, Middleton DR, Avci FY. 2019. Opsonophagocytic killing assay to assess  
1043 immunological responses against bacterial pathogens. *J Vis Exp* 146:doi: 10.3791/59400.
- 1044 91. Burton RL, Nahm MH. 2012. Development of a fourfold multiplexed opsonophagocytosis  
1045 assay for pneumococcal antibodies against additional serotypes and discovery of  
1046 serological subtypes in Streptococcus pneumoniae serotype 20. *Clin Vaccine*  
1047 *Immunol*2012/04/18. 19:835–841.
- 1048

A

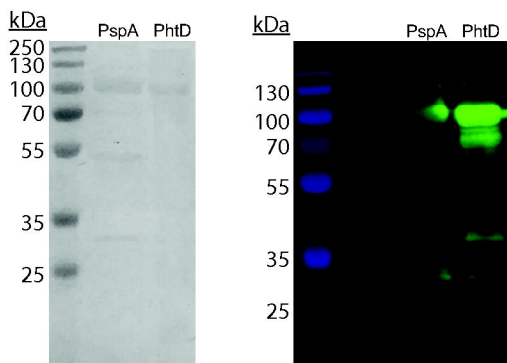

B

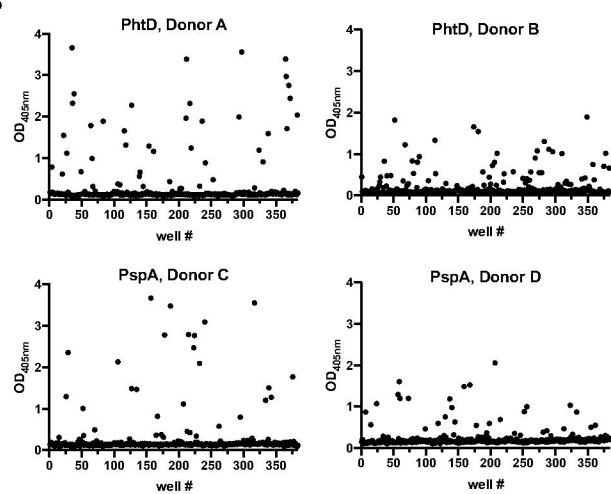

C

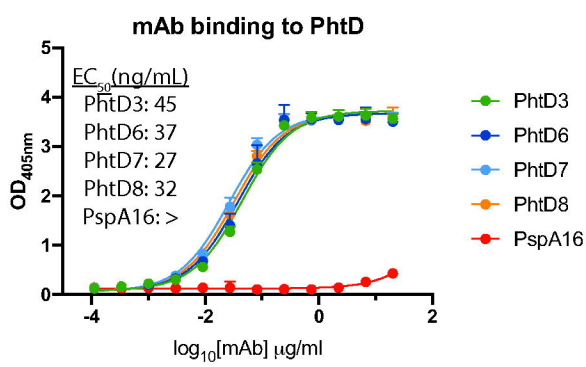

D

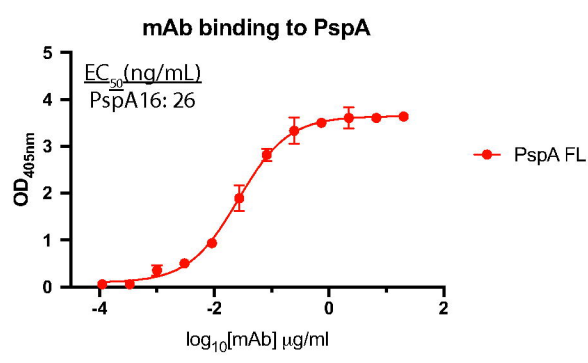

A

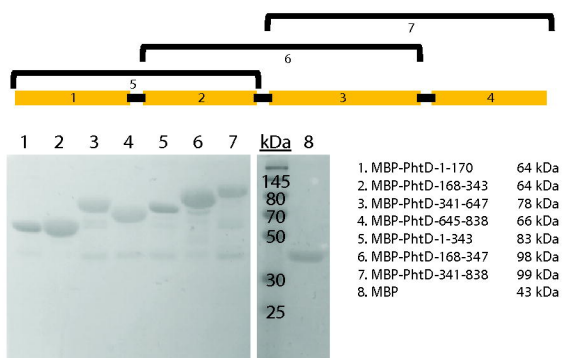

B

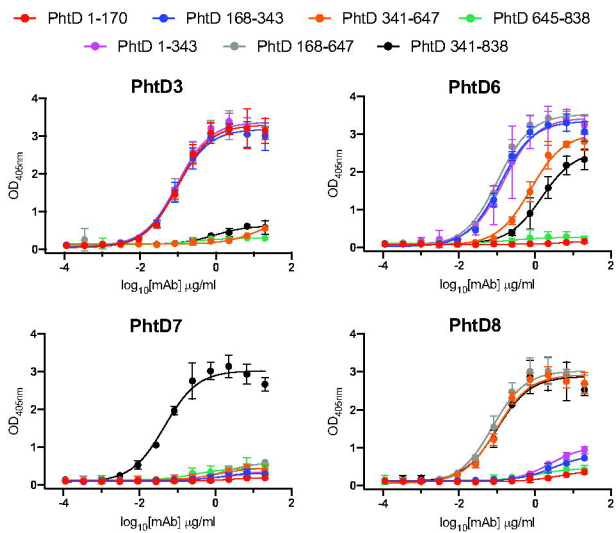

| Fragment    | 1     | 2       | 3       | 4       | 5     | 6       | 7       |
|-------------|-------|---------|---------|---------|-------|---------|---------|
| Amino acids | 1-170 | 168-343 | 341-647 | 645-838 | 1-343 | 168-647 | 341-838 |
| PhtD3       |       |         |         |         |       |         |         |
| PhtD6       |       |         |         |         |       |         |         |
| PhtD7       |       |         |         |         |       |         |         |
| PhtD8       |       |         |         |         |       |         |         |

C

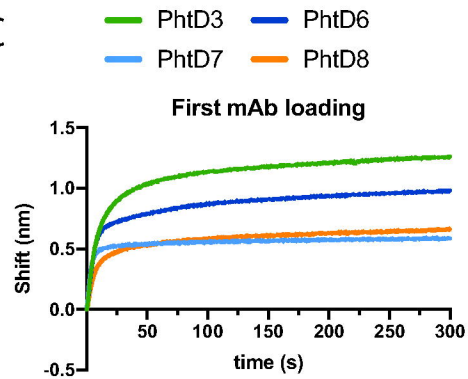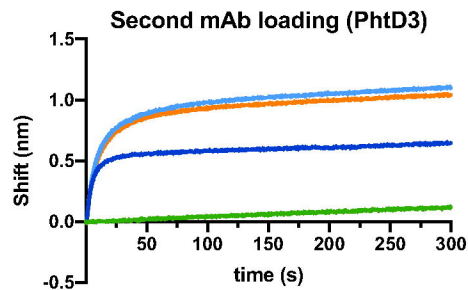

D

|           |       | Second mAb |       |       |       |
|-----------|-------|------------|-------|-------|-------|
|           |       | PhtD3      | PhtD6 | PhtD7 | PhtD8 |
| First mAb | PhtD3 | 9          | 46    | 80    | 69    |
|           | PhtD6 | 47         | 12    | 57    | 66    |
|           | PhtD7 | 81         | 84    | 18    | 95    |
|           | PhtD8 | 77         | 72    | 67    | 27    |

A

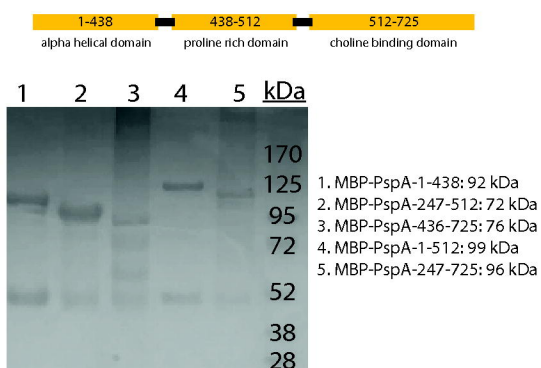

B

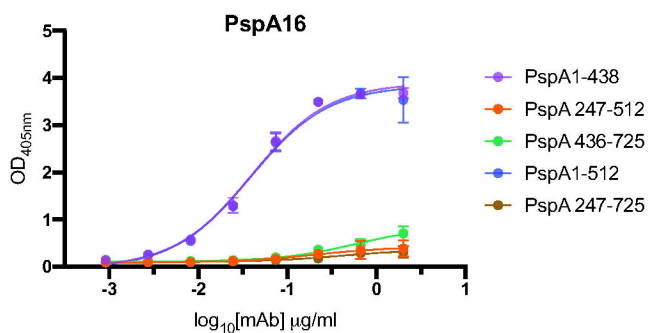

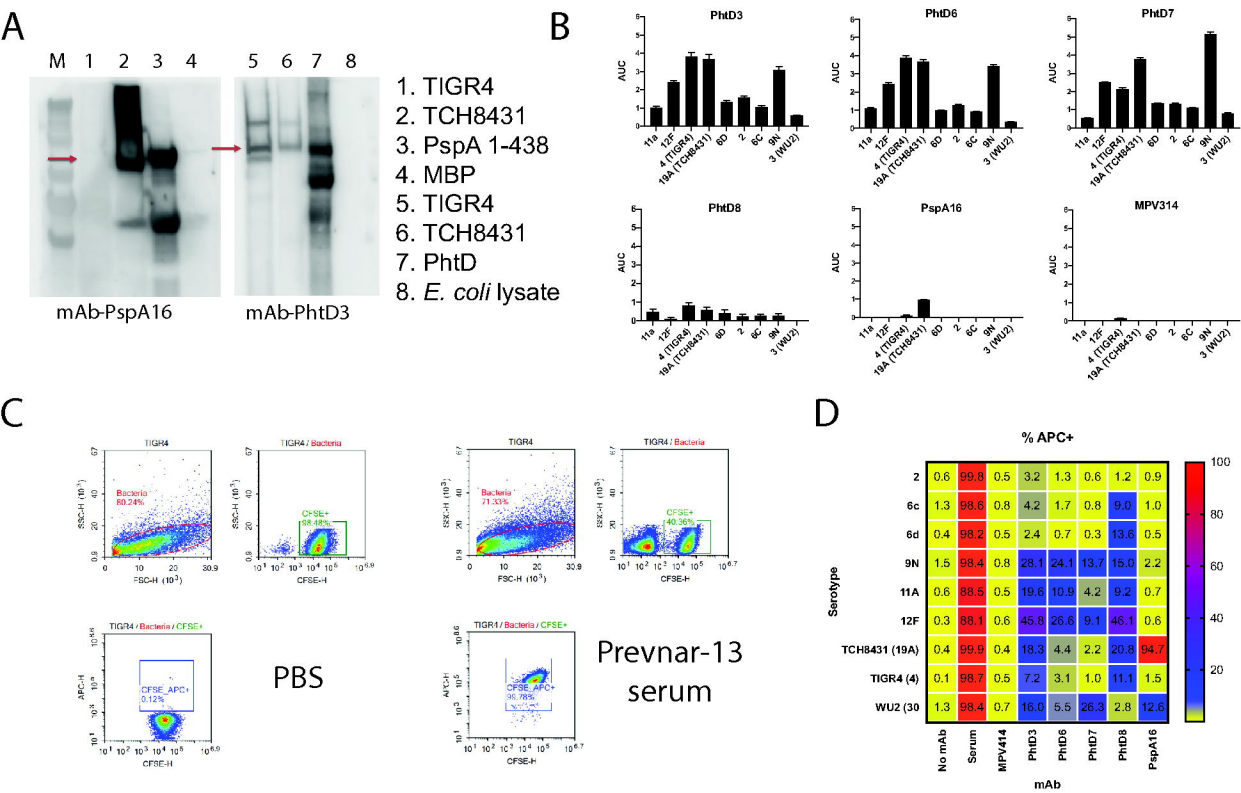

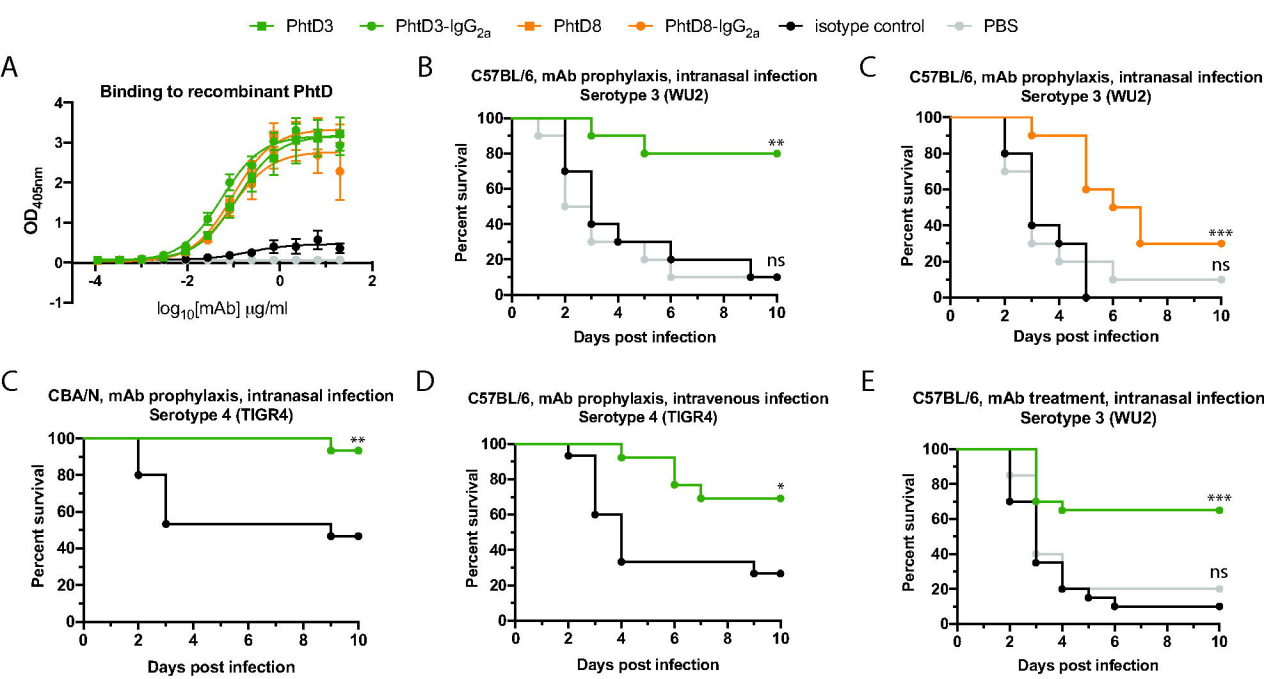

A

**OPKA**

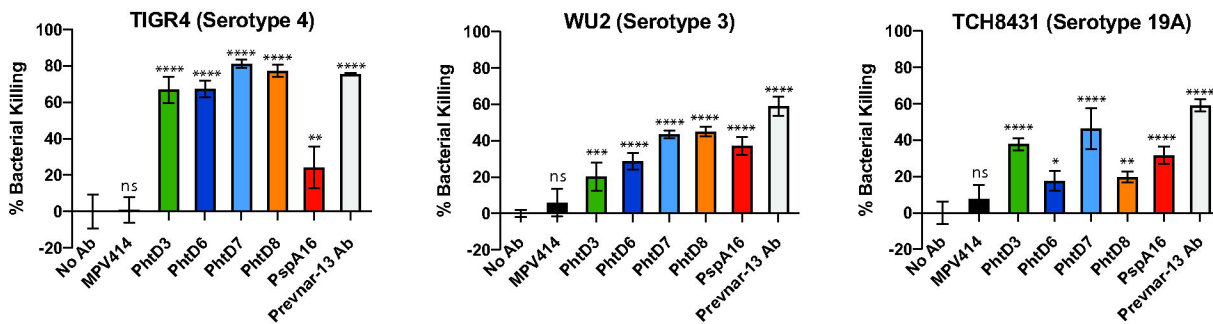

B

**Flow-based OPA**

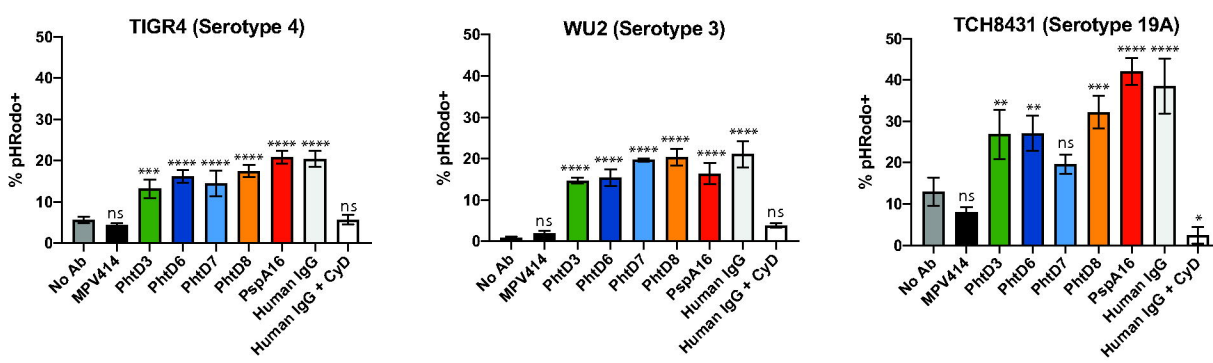

Source: https://www.biorxiv.org/content/10.1101/2021.02.17.431651v1.full.pdf
